# Supplementary material for: Synthesis of biobased and versatile monomers from itaconic acid and homocysteine thiolactone and their applications in step-growth and radical polymerization approaches
Source: Royal Society of Chemistry journal article supplement (doi:10.1039/d4py00565a), 2024-01-01
Supplement: d4py00565a1.pdf [file d4py00565a1.pdf]

Supporting Information

**Synthesis of biobased and versatile monomers from itaconic acid and homocysteine thiolactone and their applications in step-growth and radical polymerization approaches.**

Fato Niang,<sup>a</sup> Adèle Brunou-Bouard,<sup>a</sup> Gérard Cruz,<sup>a</sup> Nadège Pantoustier,<sup>b</sup> Fanny Coumes,<sup>a,\*</sup>  
Nicolas Illy<sup>a,\*</sup>

fanny.coumes@sorbonne-universite.fr

nicolas.illy@sorbonne-universite.fr

<sup>a</sup> Sorbonne Université, CNRS, Institut Parisien de Chimie Moléculaire, Equipe Chimie des Polymères, 4 place Jussieu, F-75005 Paris, France.

<sup>b</sup> Sciences et Ingénierie de La Matière Molle, ESPCI Paris, CNRS, Sorbonne Université, PSL University, Paris, France.

## Table of contents

|                    | Title                                                                                                                                                                                                     | Page      |
|--------------------|-----------------------------------------------------------------------------------------------------------------------------------------------------------------------------------------------------------|-----------|
| <b>Table S1.</b>   | Reaction conditions for the synthesis of monomer M3.                                                                                                                                                      | <b>4</b>  |
| <b>Table S2.</b>   | Table S2. Maximum amount of M1 that can be dissolved in 1.0 mL of a selected solvent                                                                                                                      | <b>4</b>  |
| <b>Figure S1.</b>  | <sup>1</sup> H NMR spectrum of monofunctional monomer M1 in DMSO-d <sub>6</sub> at 25°C.                                                                                                                  | <b>5</b>  |
| <b>Figure S2.</b>  | <sup>13</sup> C NMR spectrum of monofunctional monomer M1 in DMSO-d <sub>6</sub> at 25°C.                                                                                                                 | <b>6</b>  |
| <b>Figure S3.</b>  | COSY NMR spectrum of monofunctional monomer M1 in DMSO-d <sub>6</sub> at 25°C.                                                                                                                            | <b>6</b>  |
| <b>Figure S4.</b>  | <sup>1</sup> H- <sup>13</sup> C HSQC NMR spectrum of monofunctional monomer M1 in DMSO-d <sub>6</sub> at 25°C.                                                                                            | <b>7</b>  |
| <b>Figure S5.</b>  | ESI mass spectrometry analysis of M1.                                                                                                                                                                     | <b>7</b>  |
| <b>Figure S6.</b>  | <sup>1</sup> H NMR spectrum of esterified monofunctional monomer M2 in DMSO-d <sub>6</sub> at 25°C.                                                                                                       | <b>8</b>  |
| <b>Figure S7.</b>  | <sup>13</sup> C NMR spectrum of esterified monofunctional monomer M2 in DMSO-d <sub>6</sub> at 25°C.                                                                                                      | <b>8</b>  |
| <b>Figure S8.</b>  | COSY NMR spectrum of monofunctional monomer M2 in DMSO-d <sub>6</sub> at 25°C.                                                                                                                            | <b>9</b>  |
| <b>Figure S9.</b>  | <sup>1</sup> H- <sup>13</sup> C HSQC NMR spectrum of monofunctional monomer M2 in DMSO-d <sub>6</sub> at 25°C.                                                                                            | <b>9</b>  |
| <b>Figure S10.</b> | ESI mass spectrometry analysis of M2.                                                                                                                                                                     | <b>10</b> |
| <b>Scheme S1.</b>  | Possible side-reactions during the monomer syntheses.                                                                                                                                                     | <b>10</b> |
| <b>Figure S11.</b> | <sup>1</sup> H NMR spectrum in DMSO-d <sub>6</sub> of the polymer obtained for reaction 1 Table S1 without coupling agent.                                                                                | <b>11</b> |
| <b>Figure S12.</b> | <sup>1</sup> H NMR spectra in DMSO-d <sub>6</sub> of the reaction mixtures of M3 synthesis under various conditions.                                                                                      | <b>12</b> |
| <b>Figure S13.</b> | <sup>1</sup> H NMR spectrum of difunctional monomer M3 in DMSO-d <sub>6</sub> at 25°C.                                                                                                                    | <b>13</b> |
| <b>Figure S14.</b> | <sup>13</sup> C NMR spectrum of bifunctional monomer M3 in DMSO-d <sub>6</sub> at 25°C.                                                                                                                   | <b>13</b> |
| <b>Figure S15.</b> | COSY NMR spectrum of bifunctional monomer M3 in DMSO-d <sub>6</sub> at 25°C.                                                                                                                              | <b>14</b> |
| <b>Figure S16.</b> | <sup>1</sup> H- <sup>13</sup> C HSQC NMR spectrum of bifunctional monomer M3 in DMSO-d <sub>6</sub> at 25°C.                                                                                              | <b>14</b> |
| <b>Figure S17.</b> | <sup>1</sup> H NMR spectra in DMSO-d <sub>6</sub> of M1 monomer and of a poly(amide-thioether) obtained in Table 1, run 1.                                                                                | <b>15</b> |
| <b>Figure S18.</b> | <sup>1</sup> H NMR spectrum in DMSO-d <sub>6</sub> at 25°C of the reaction mixture after 6 h of the synthesis of a poly(amide-thioether) by the reaction of M1 with <i>n</i> -hexylamine (Table 1, run1). | <b>15</b> |
| <b>Figure S19.</b> | <sup>1</sup> H- <sup>1</sup> H COSY NMR spectrum in DMSO-d <sub>6</sub> at 25°C of a poly(amide-thioether) synthesized by the reaction of M1 with <i>n</i> -hexylamine (Table 1, run1).                   | <b>16</b> |
| <b>Figure S20.</b> | <sup>1</sup> H- <sup>13</sup> C HSQC NMR spectrum in DMSO-d <sub>6</sub> at 25°C of a poly(amide-thioether) synthesized by the reaction of M1 with <i>n</i> -hexylamine (Table 1, run1).                  | <b>17</b> |
| <b>Figure S21.</b> | <sup>13</sup> C NMR spectrum in DMSO-d <sub>6</sub> at 25°C of a poly(amide-thioether)                                                                                                                    | <b>18</b> |

|                    |                                                                                                                                                                               |           |
|--------------------|-------------------------------------------------------------------------------------------------------------------------------------------------------------------------------|-----------|
|                    | synthesized by the reaction of M1 with <i>n</i> -hexylamine (Table 1, run1).                                                                                                  |           |
| <b>Figure S22.</b> | <sup>1</sup> H NMR spectrum in D <sub>2</sub> O at 25°C of a poly(amide-thioether) synthesized by the reaction of M1 with ethanolamine (Table 1, run 6).                      | <b>19</b> |
| <b>Figure S23.</b> | <sup>1</sup> H- <sup>1</sup> H COSY NMR spectrum in D <sub>2</sub> O at 25°C of a poly(amide-thioether) synthesized by the reaction of M1 with ethanolamine (Table 1, run 6). | <b>20</b> |
| <b>Figure S24.</b> | <sup>1</sup> H NMR spectrum in DMSO-d <sub>6</sub> at 25°C of a poly(amide-thioether) synthesized by the reaction of M1 with glycine (Table 1, run 8).                        | <b>21</b> |
| <b>Figure S25.</b> | <sup>1</sup> H NMR spectrum in D <sub>2</sub> O at 25°C of a poly(amide-thioether) synthesized by the reaction of M1 with L-lysine methylester (Table 1, run 9).              | <b>21</b> |
| <b>Figure S26.</b> | <sup>1</sup> H NMR spectrum in DMSO-d <sub>6</sub> at 25°C of a poly(amide-thioether) synthesized by the reaction of M1 with L-lysine methylester (Table 1, run 9).           | <b>22</b> |
| <b>Figure S27.</b> | TGA profile for M1 monomer.                                                                                                                                                   | <b>23</b> |
| <b>Figure S28.</b> | (A) TGA and (B) DSC thermograms for PR1, 2 <sup>nd</sup> heating.                                                                                                             | <b>23</b> |
| <b>Figure S29.</b> | <sup>1</sup> H NMR overlay of aliquots from CPR1 reaction mixture (top) and individual plot of conversion over time (bottom).                                                 | <b>24</b> |
| <b>Figure S30.</b> | <sup>1</sup> H NMR spectrum in DMSO-d <sub>6</sub> at 25°C of the copolymer obtained by the copolymerization of M1 with MMA in Table 3, CPR1.                                 | <b>25</b> |
| <b>Figure S31.</b> | <sup>1</sup> H NMR spectrum in DMSO-d <sub>6</sub> at 25°C of the copolymer obtained by the copolymerization of M1 with MMA in Table 3, CPR2.                                 | <b>25</b> |
| <b>Figure S32.</b> | <sup>1</sup> H NMR spectrum in DMSO-d <sub>6</sub> of the copolymer obtained by the copolymerization of M1 with MMA in Table 3, CPR3.                                         | <b>26</b> |
| <b>Figure S33.</b> | <sup>1</sup> H NMR spectrum in DMSO-d <sub>6</sub> of the copolymer obtained by the copolymerization of M1 with MMA in Table 3, CPR4.                                         | <b>26</b> |
| <b>Figure S34.</b> | <sup>1</sup> H NMR spectrum in DMSO-d <sub>6</sub> of the copolymer obtained by the copolymerization of M1 with MMA in Table 3, CPR5.                                         | <b>27</b> |
| <b>Figure S35.</b> | <sup>1</sup> H NMR spectrum in DMSO-d <sub>6</sub> of the copolymer obtained by the copolymerization of M1 with MAA in Table 3, CPR6.                                         | <b>27</b> |
| <b>Figure S36.</b> | <sup>1</sup> H NMR spectrum in DMSO-d <sub>6</sub> of the copolymer obtained by the copolymerization of M1 with MAA in Table 3, CPR7.                                         | <b>28</b> |
| <b>Figure S37.</b> | <sup>1</sup> H NMR spectrum in DMSO-d <sub>6</sub> of the copolymer obtained by the copolymerization of M1 with MAA in Table 3, CPR8.                                         | <b>28</b> |

**Table S1.** Reaction conditions for the synthesis of monomer M3.

| Entry | Coupling agent | [IA]:[HTL]:[CA] | Solvent          | pH  | T° (°C) | Time | Product M3         | Yield (%) |
|-------|----------------|-----------------|------------------|-----|---------|------|--------------------|-----------|
| 1     | None           | 1:2:0           | H <sub>2</sub> O | 8   | 25      | 24   | No                 | -         |
| 2     | PyBOP          | 1:2:2.1         | DMSO             | -   | 25      | 144  | No                 | -         |
| 3     | EDC            | 1:2.5:1.2       | H <sub>2</sub> O | 8   | 25      | 24   | No                 | -         |
| 4     | EDC            | 1:2.5:1.2       | H <sub>2</sub> O | 8   | 60      | 24   | No                 | -         |
| 5     | EDC            | 1:2.5:2.5       | H <sub>2</sub> O | 4.5 | 25      | 24   | No                 | -         |
| 6     | EDC + DMAP     | 1:2.1:2.1       | H <sub>2</sub> O | 6   | 25      | 24   | No                 | -         |
| 7     | EDC + DMAP     | 1:2.1:2.1       | H <sub>2</sub> O | 8   | 25      | 24   | No                 | -         |
| 8     | EDC + HOBT     | 1:2.1:2.1       | H <sub>2</sub> O | 4.5 | 25      | 21   | No                 | -         |
| 9     | EDC + HOBT     | 1:2.1:2.1       | H <sub>2</sub> O | 7   | 25      | 4.5  | Yes + side product | -         |
| 10    | EDC + HOBT     | 1:2.1:2.1       | H <sub>2</sub> O | 6   | 25      | 3.5  | Yes                | 5         |
| 11    | EDC + HOBT     | 1:2.1:2.1       | H <sub>2</sub> O | 6   | 25      | 23   | Yes                | 3         |
| 12    | DMTMM          | 1:2.1:2.1       | H <sub>2</sub> O | 8   | 25      | 4    | Yes + side product | -         |
| 13    | DMTMM          | 1:2.1:2.1       | H <sub>2</sub> O | 6   | 25      | 4    | Yes                | 12-20     |

**Table S2.** Maximum amount of M1 that can be dissolved in 1.0 mL of a selected solvent (visual determination).

| Solvent           | Mass (mg) |
|-------------------|-----------|
| Deionized Water   | 5         |
| Methanol          | 10        |
| DMSO              | 500       |
| DMF               | 100       |
| DMAC              | 200       |
| Ethanol           | 10        |
| Acetone           | -         |
| Ethyl acetate     | -         |
| THF               | 10        |
| CHCl <sub>3</sub> | -         |
| Toluene           | -         |
| Anisole           | -         |

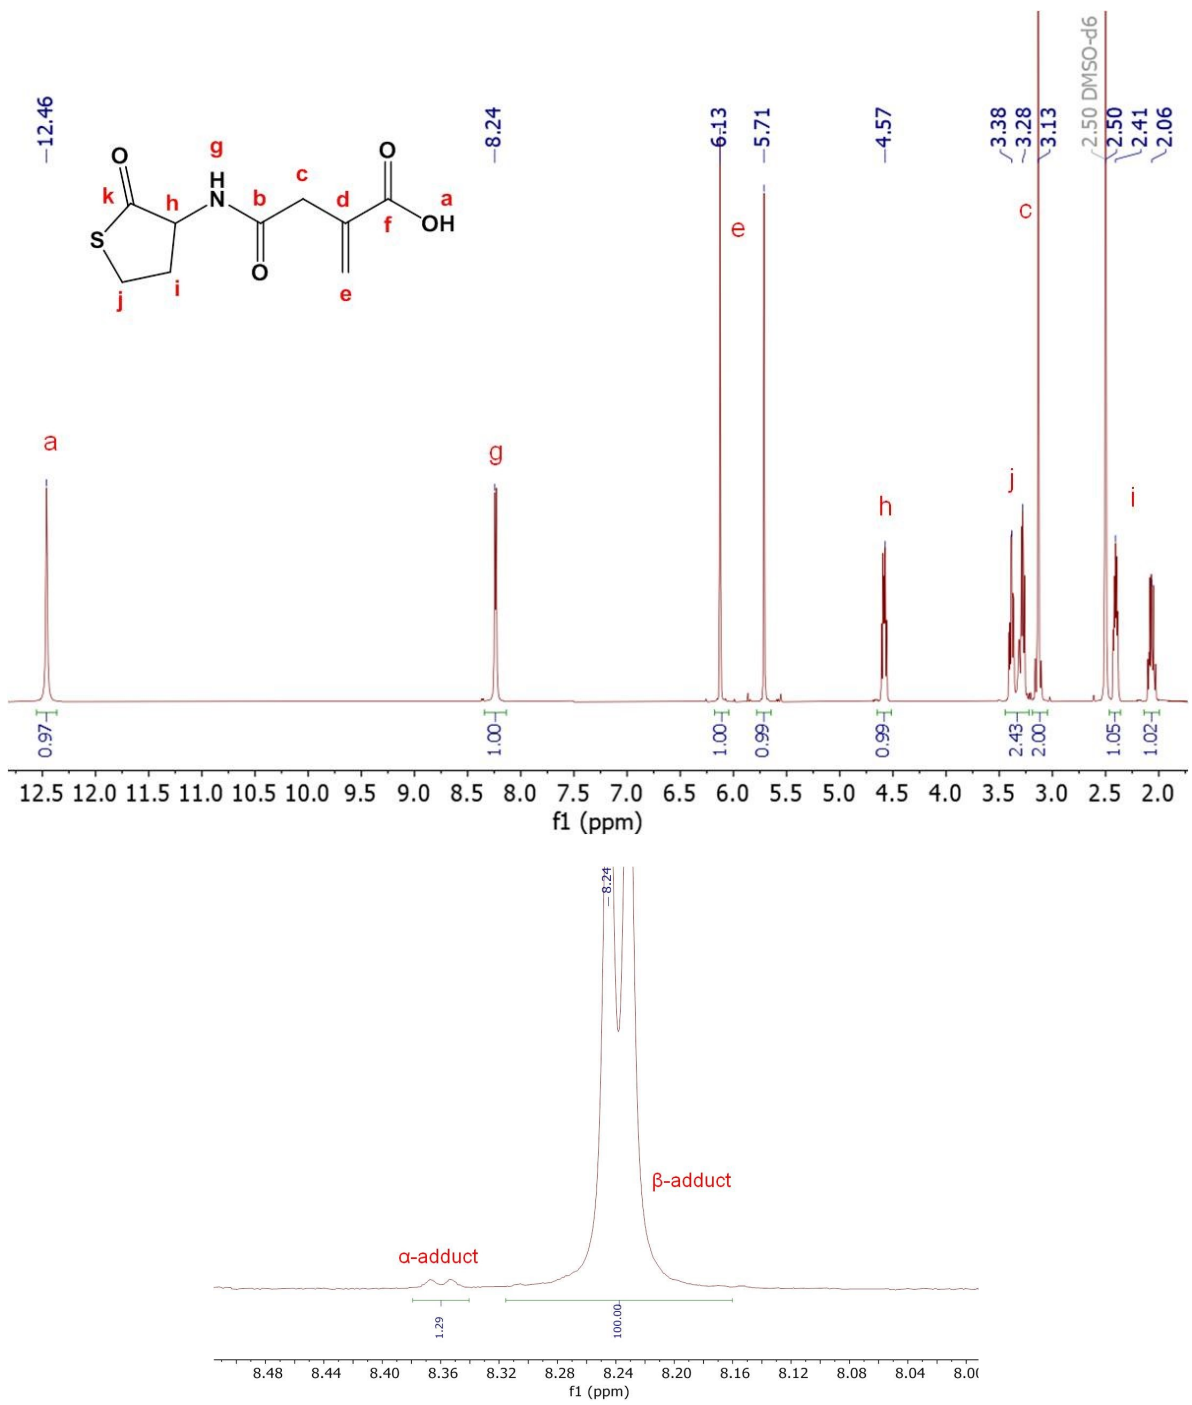

**Figure S1.** <sup>1</sup>H NMR spectrum of monofunctional monomer M1 in DMSO-d<sub>6</sub> at 25°C.

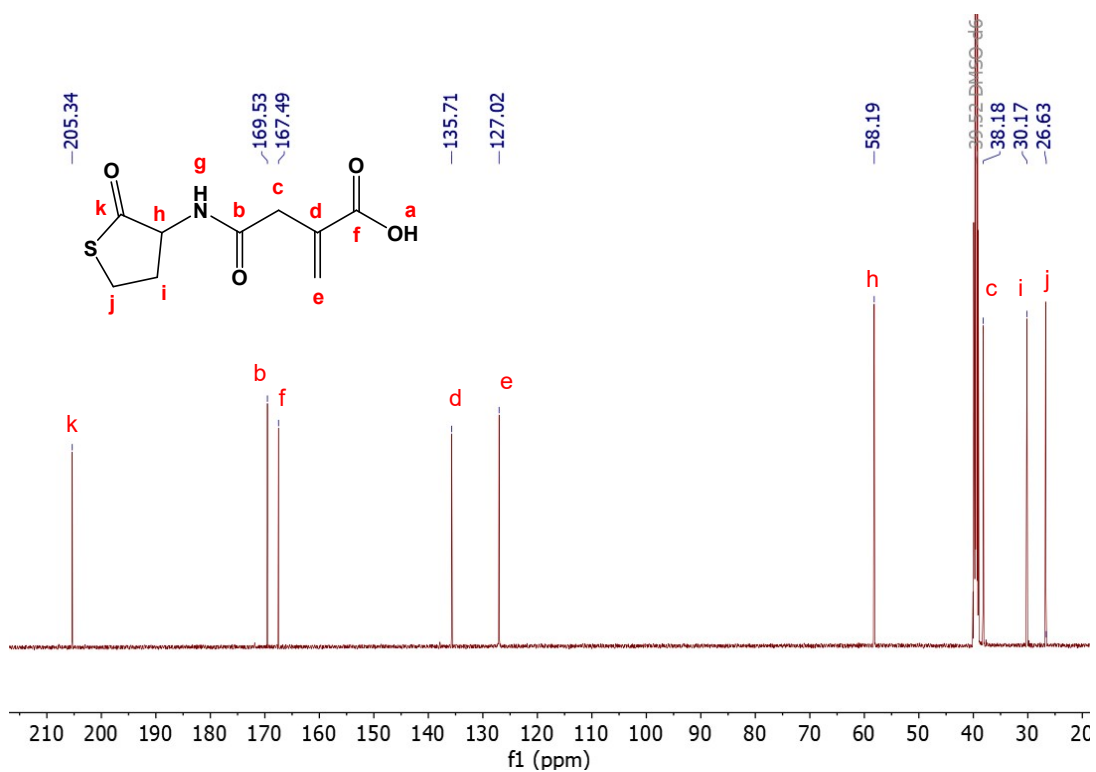

Figure S2.  $^{13}\text{C}$  NMR spectrum of monofunctional monomer M1 in  $\text{DMSO-d}_6$  at  $25^\circ\text{C}$ .

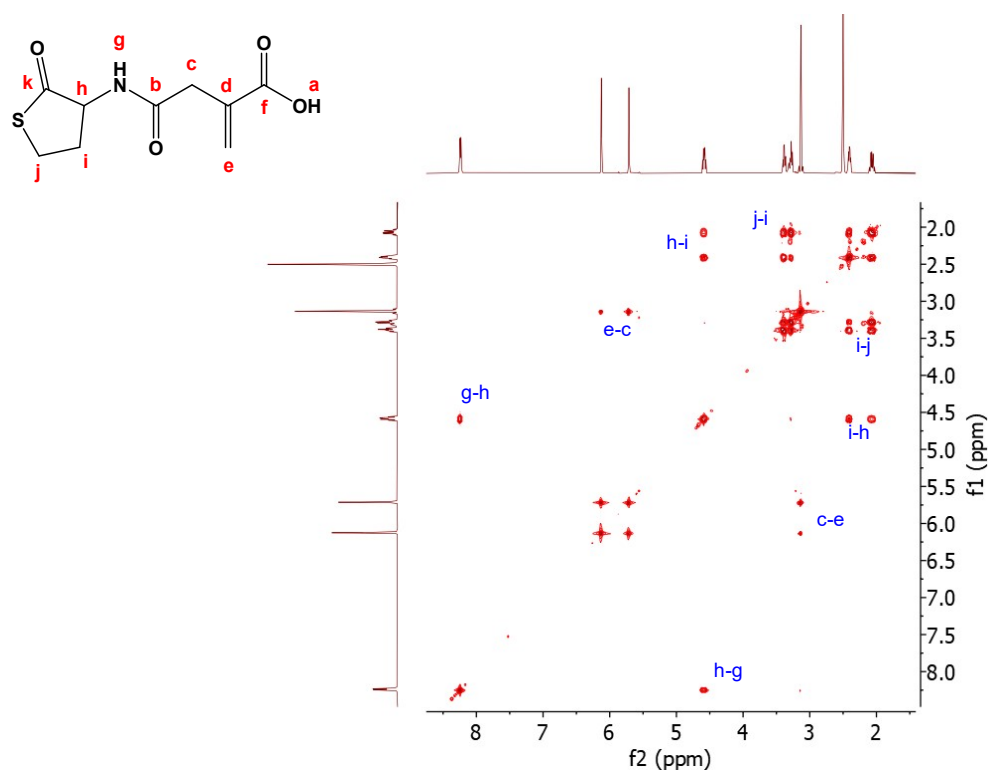

Figure S3. COSY NMR spectrum of monofunctional monomer M1 in  $\text{DMSO-d}_6$  at  $25^\circ\text{C}$ .

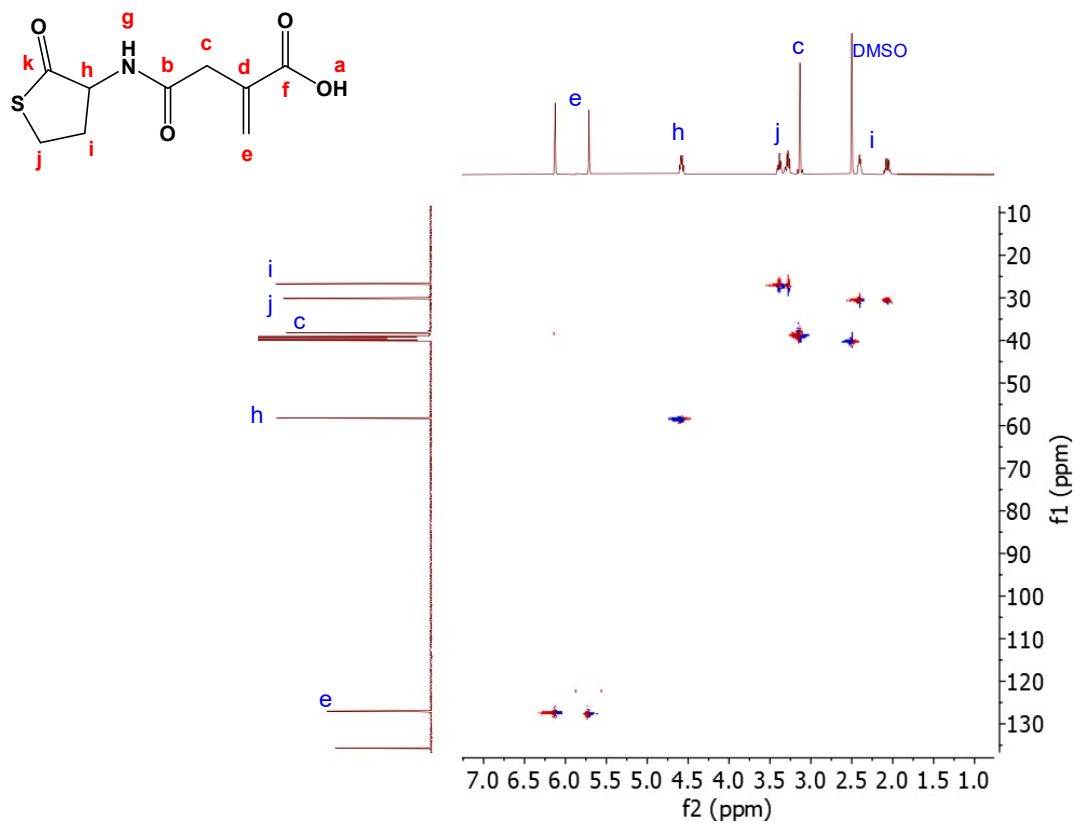

**Figure S4.**  $^1\text{H}$ - $^{13}\text{C}$  HSQC NMR spectrum of monofunctional monomer M1 in DMSO- $d_6$  at 25°C.

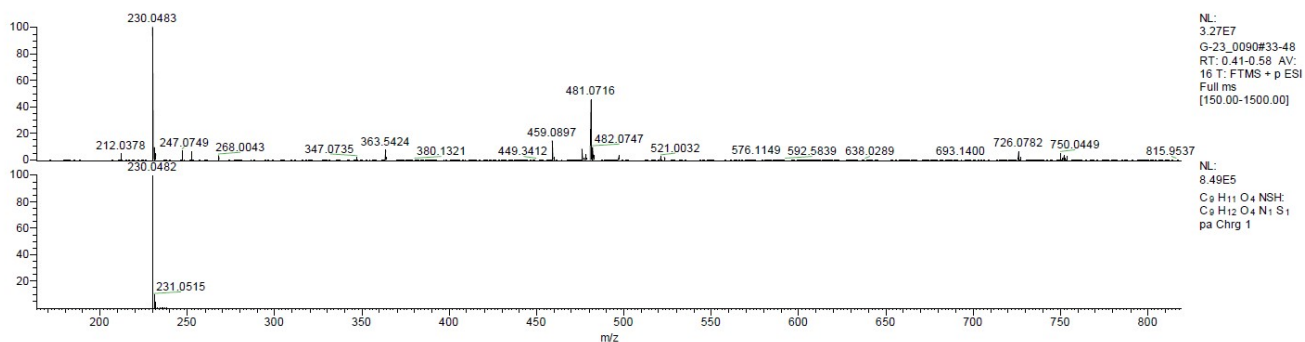

**Figure S5.** ESI mass spectrometry analysis of M1.

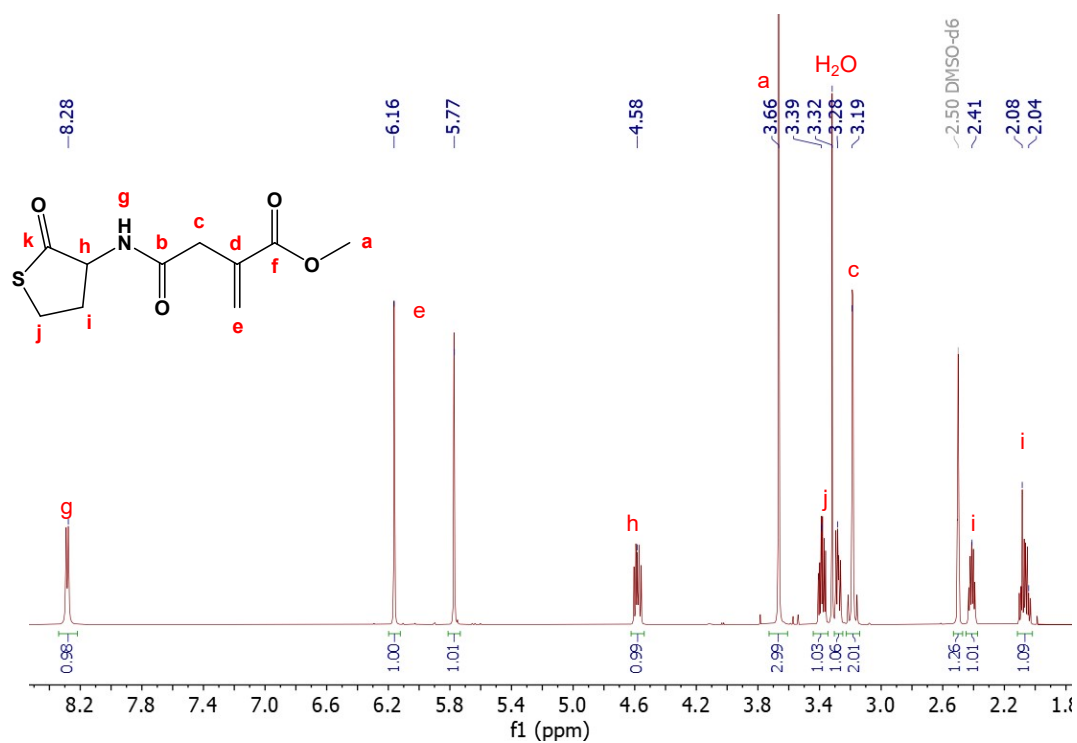

**Figure S6.**  $^1\text{H}$  NMR spectrum of esterified monofunctional monomer M2 in  $\text{DMSO-d}_6$  at  $25^\circ\text{C}$ .

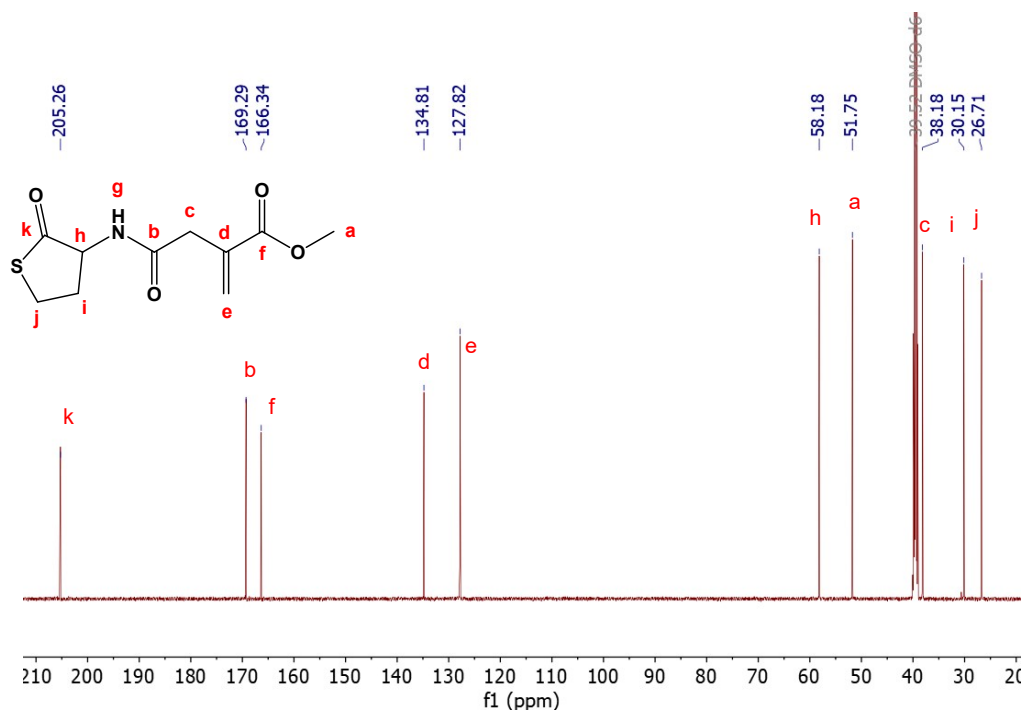

**Figure S7.**  $^{13}\text{C}$  NMR spectrum of esterified monofunctional monomer M2 in  $\text{DMSO-d}_6$  at  $25^\circ\text{C}$ .



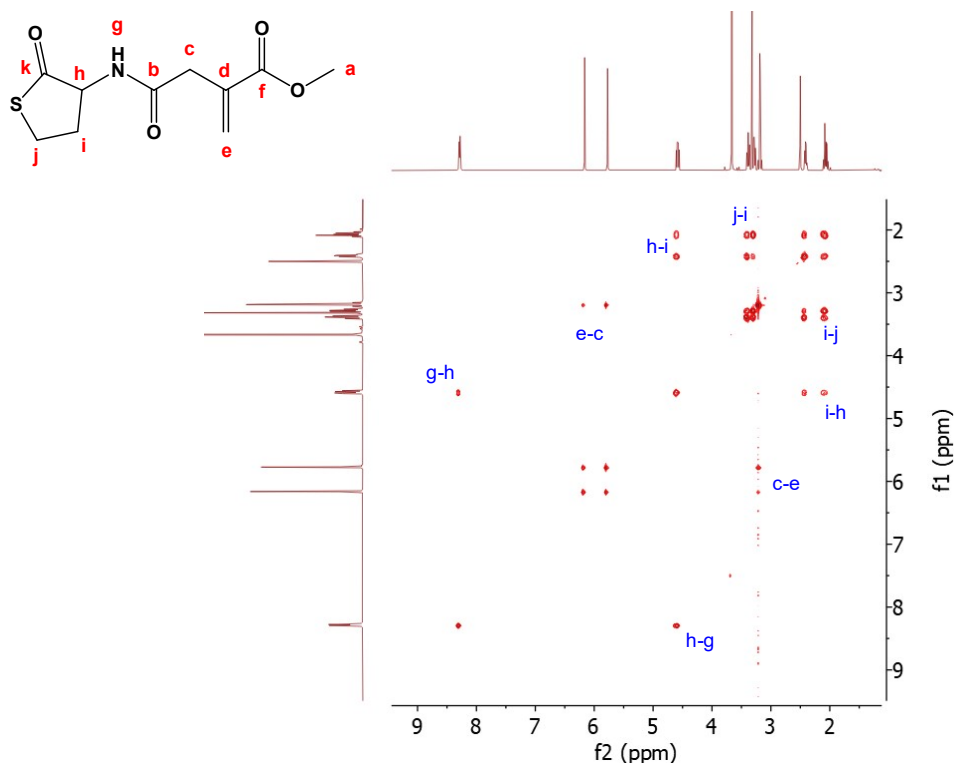

**Figure S8.** COSY NMR spectrum of monofunctional monomer M2 in DMSO-d<sub>6</sub> at 25°C.

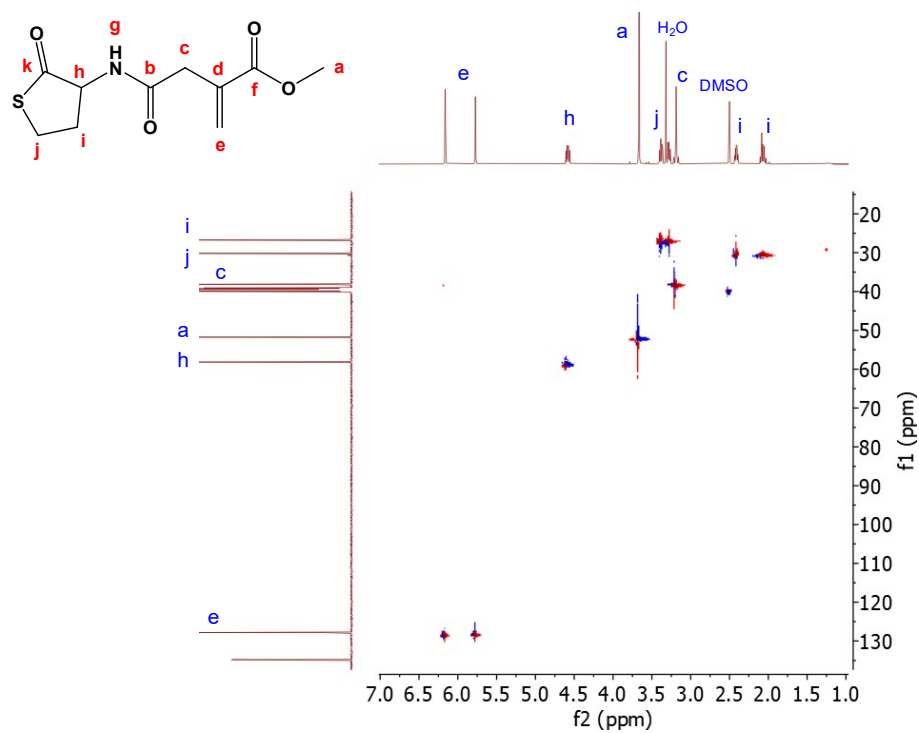

**Figure S9.** <sup>1</sup>H-<sup>13</sup>C HSQC NMR spectrum of monofunctional monomer M2 in DMSO-d<sub>6</sub> at 25°C.

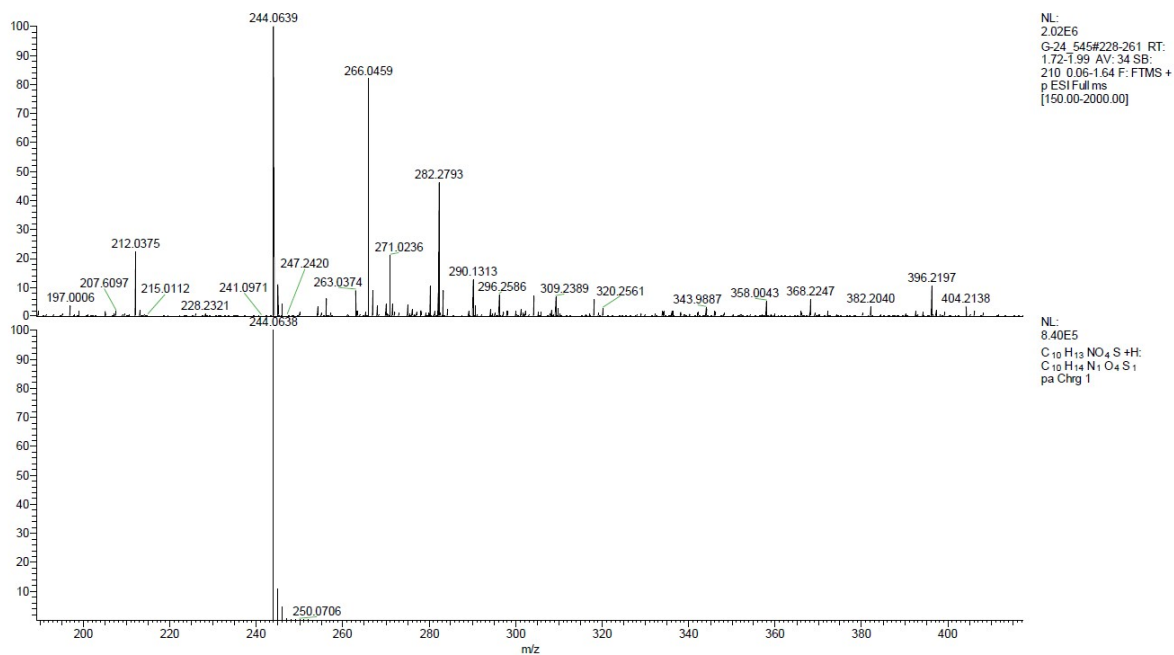

**Figure S10.** ESI mass spectrometry analysis of M2.

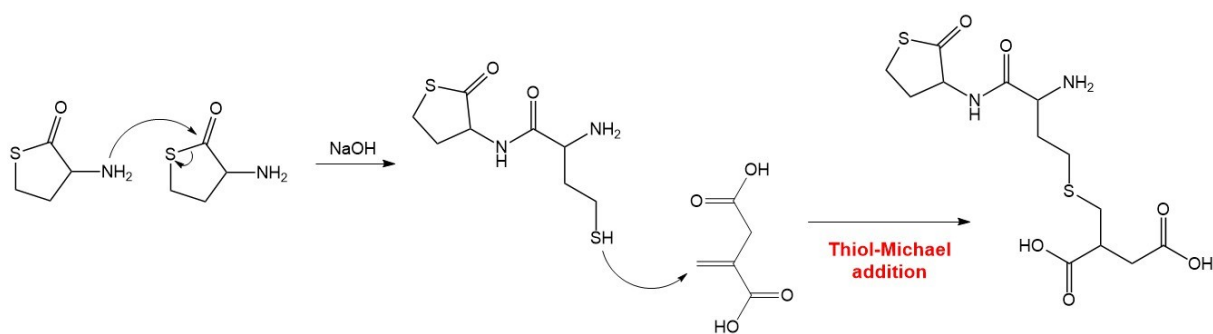

**Scheme S1.** Possible side-reactions during the monomer syntheses.

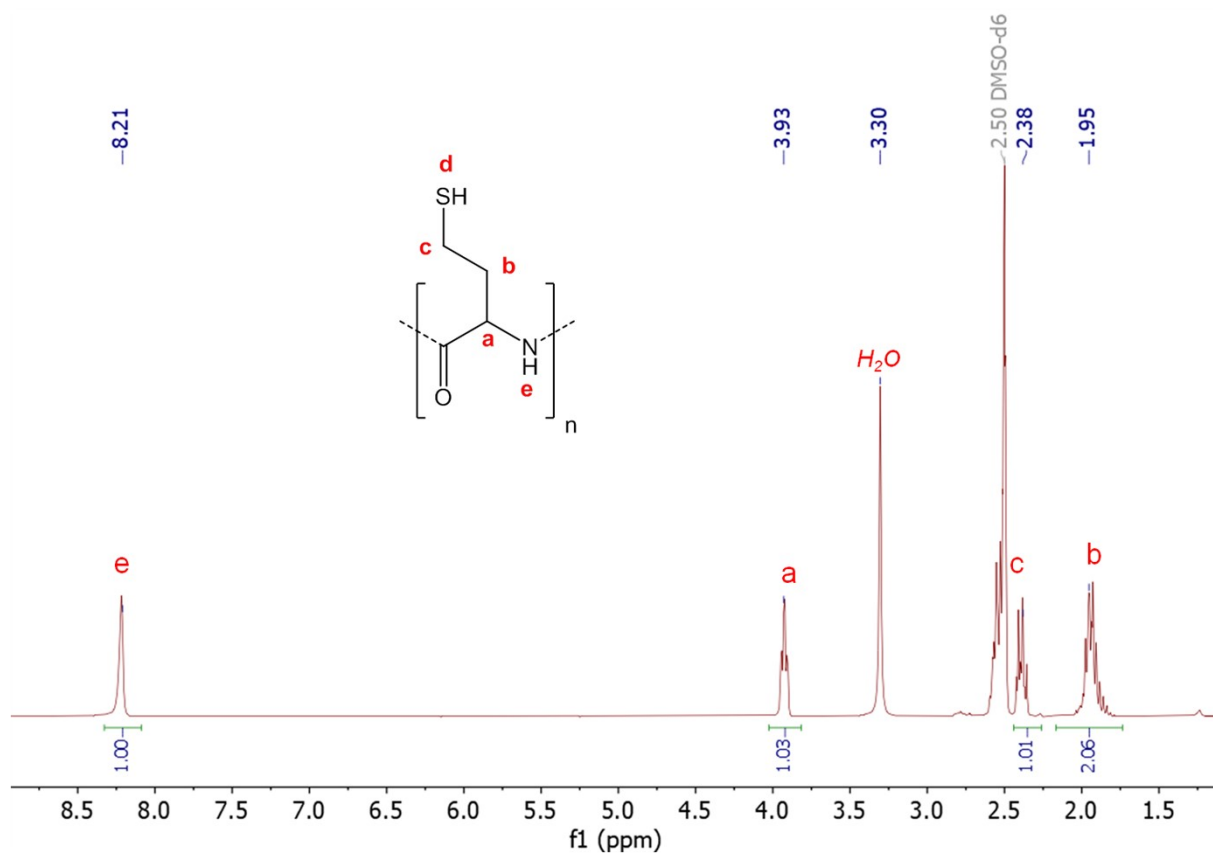

**Figure S11.**  $^1\text{H}$  NMR spectrum in  $\text{DMSO-d}_6$  of the polymer obtained for reaction 1 Table S1 without coupling agent.

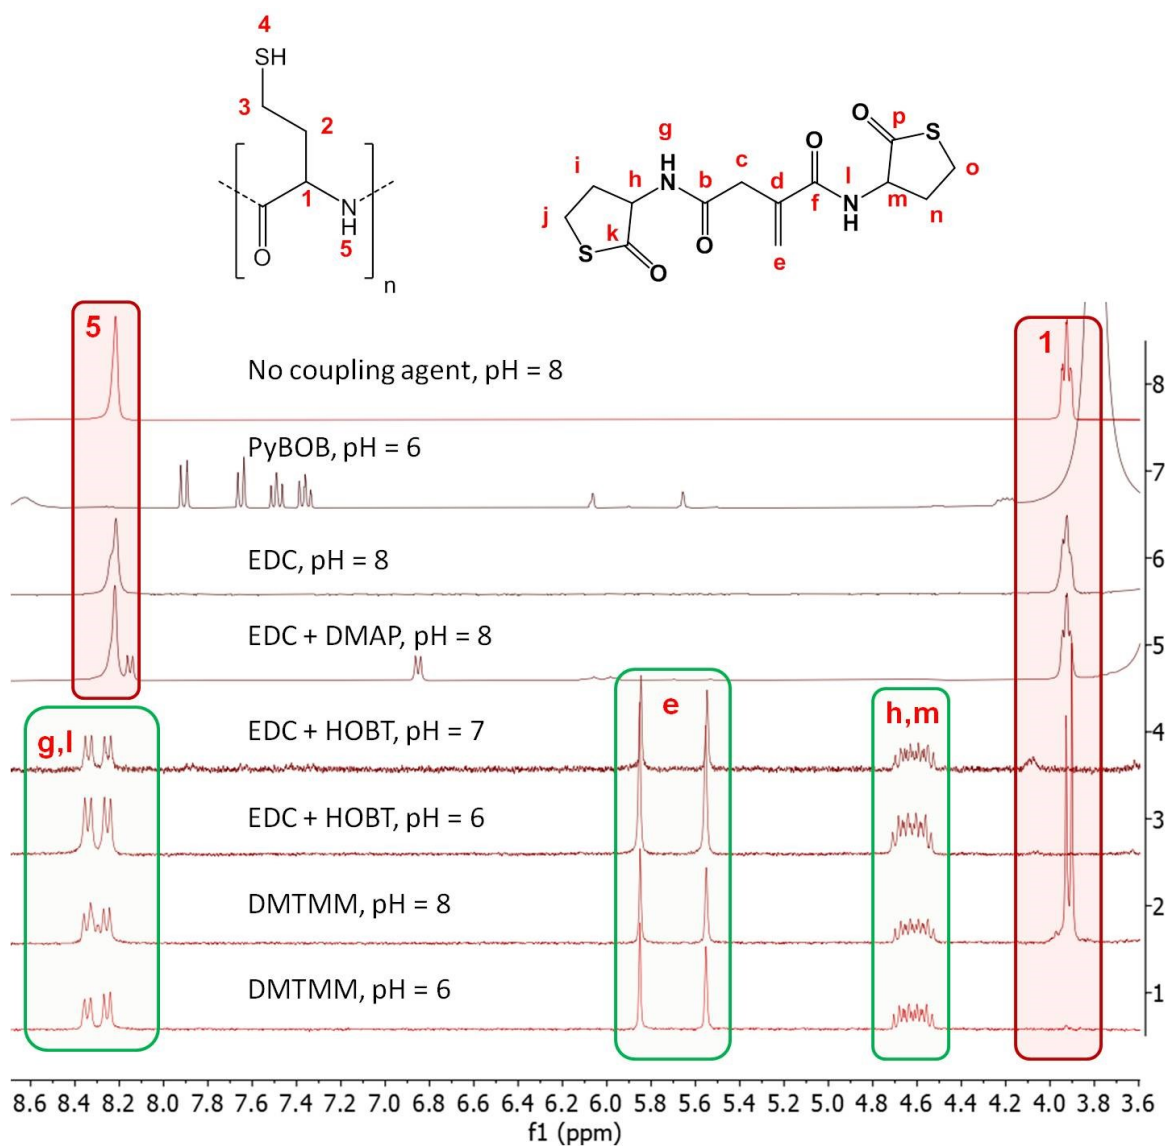

**Figure S12.**  $^1\text{H}$  NMR spectra in  $\text{DMSO-d}_6$  of the reaction mixtures of M3 synthesis under various conditions.

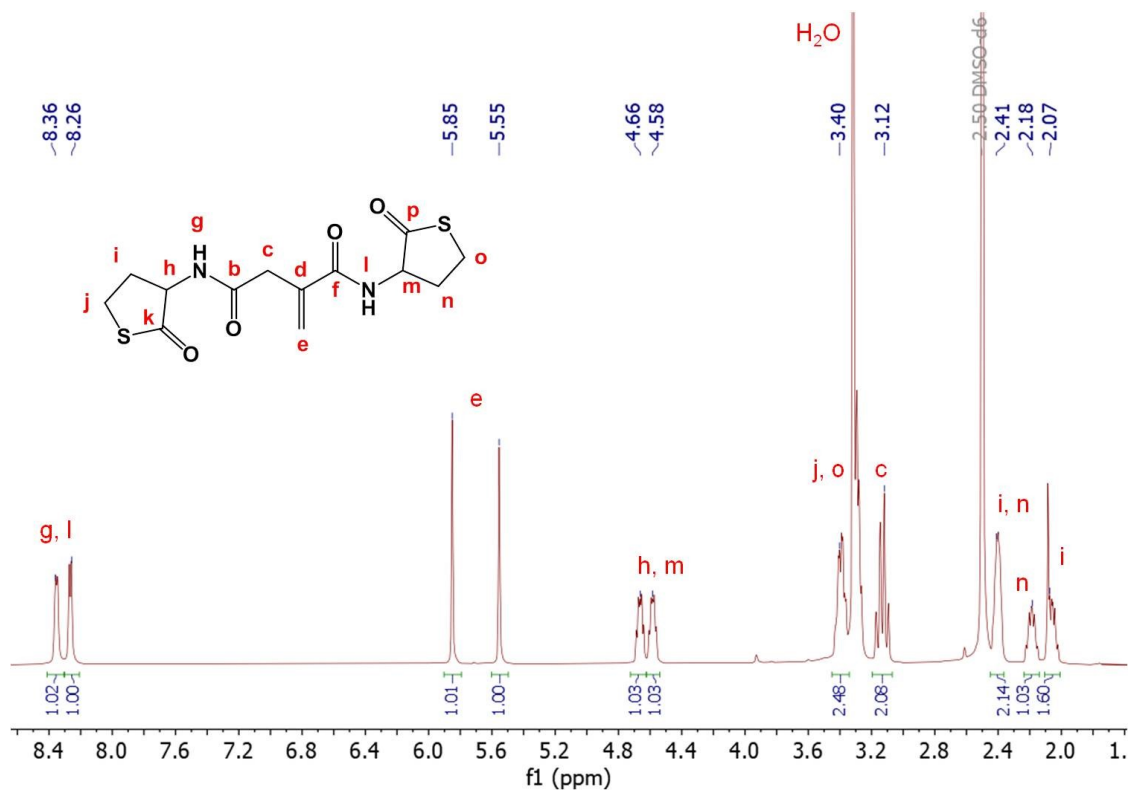

Figure S13. <sup>1</sup>H NMR spectrum of difunctional monomer M3 in DMSO-d<sub>6</sub> at 25°C.

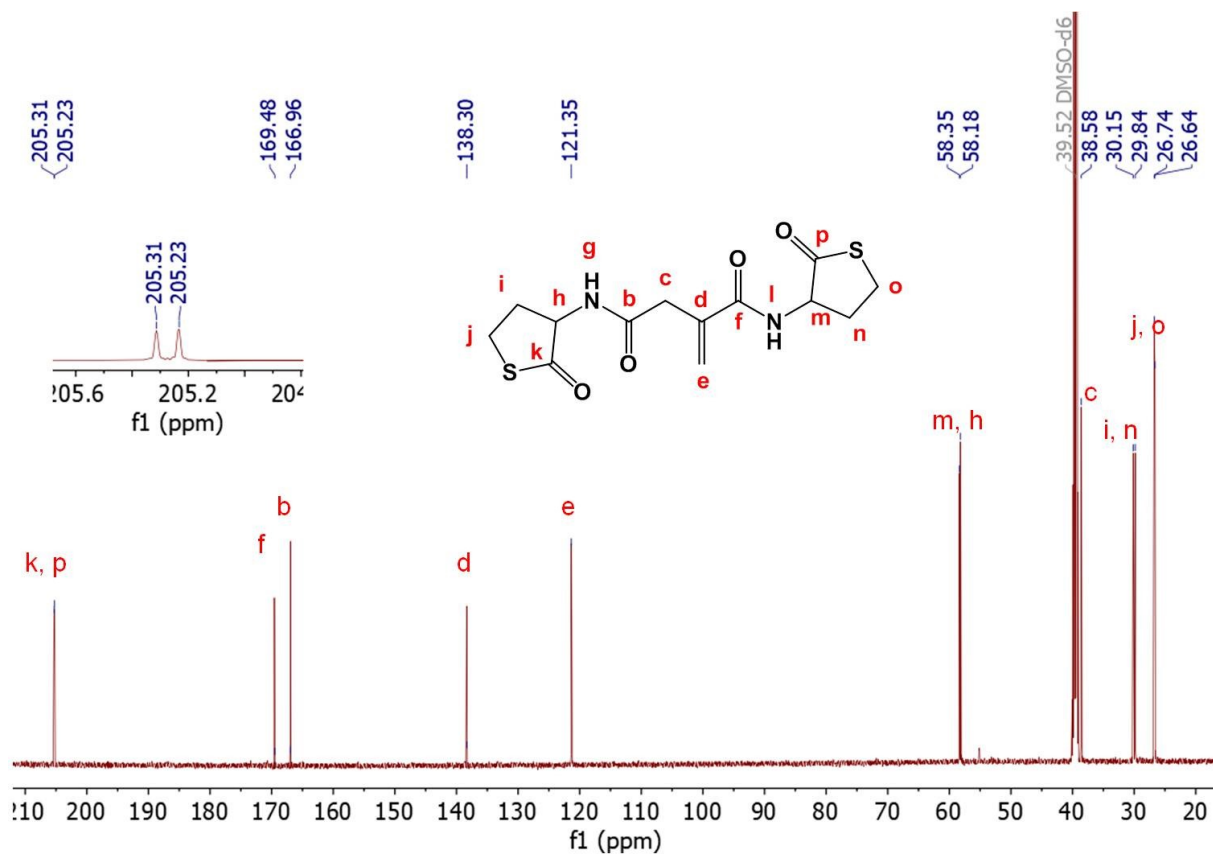

Figure S14. <sup>13</sup>C NMR spectrum of bifunctional monomer M3 in DMSO-d<sub>6</sub> at 25°C.

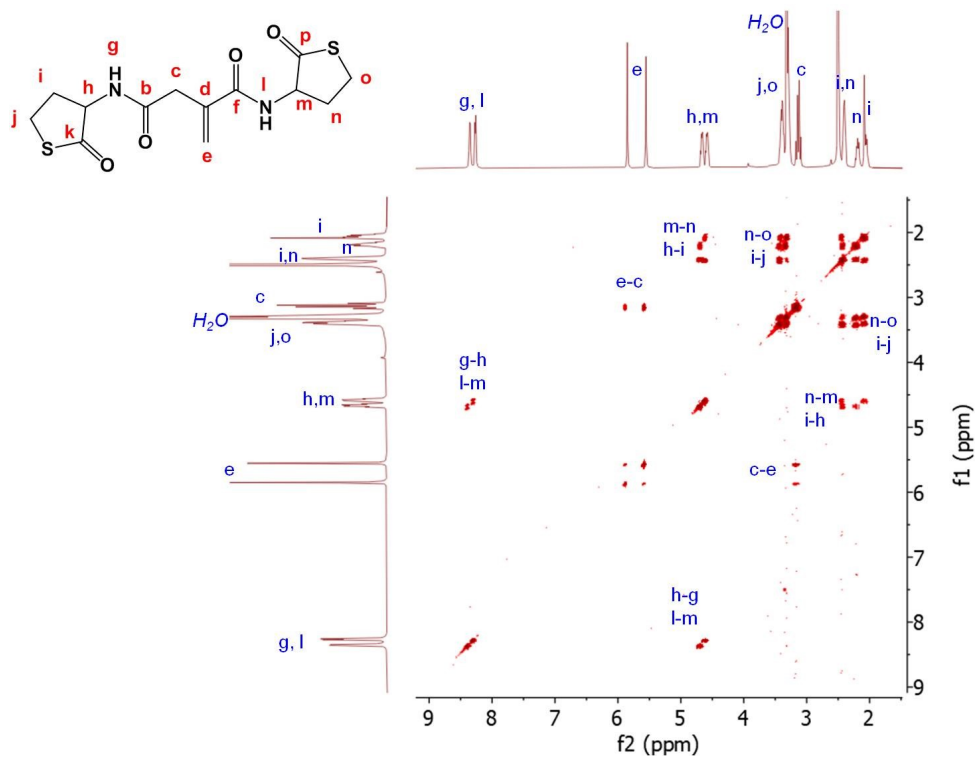

**Figure S15.** COSY NMR spectrum of bifunctional monomer M3 in DMSO-d<sub>6</sub> at 25°C.

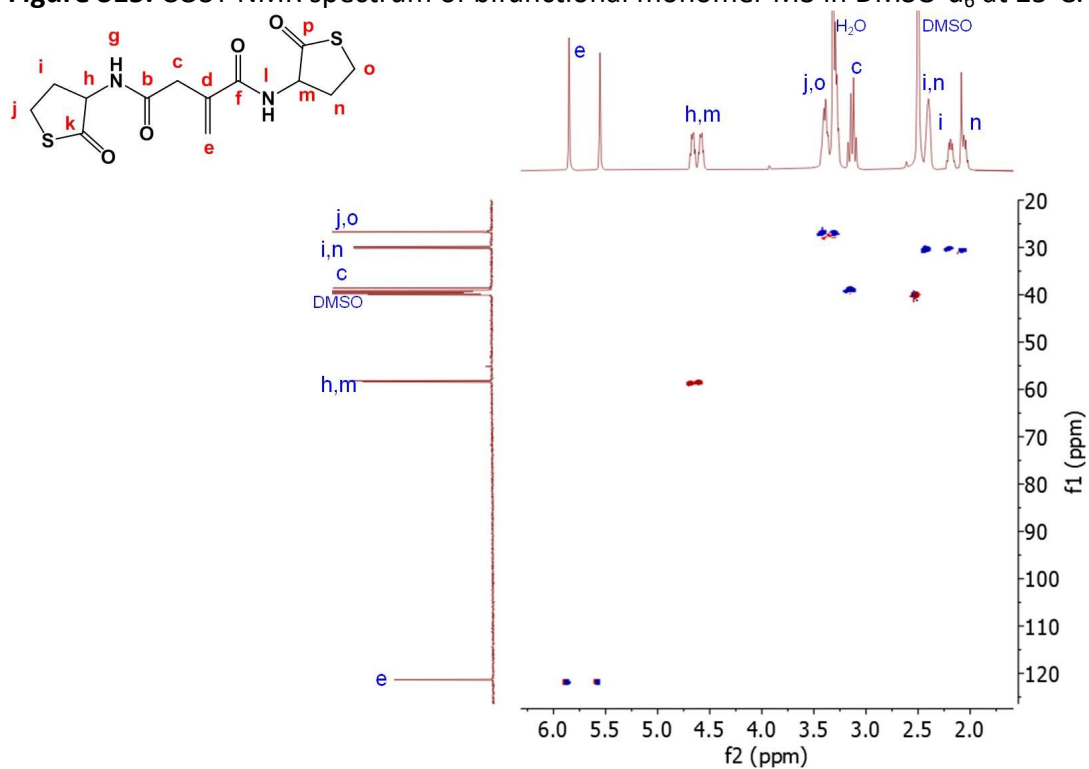

**Figure S16.** <sup>1</sup>H-<sup>13</sup>C HSQC NMR spectrum of bifunctional monomer M3 in DMSO-d<sub>6</sub> at 25°C.

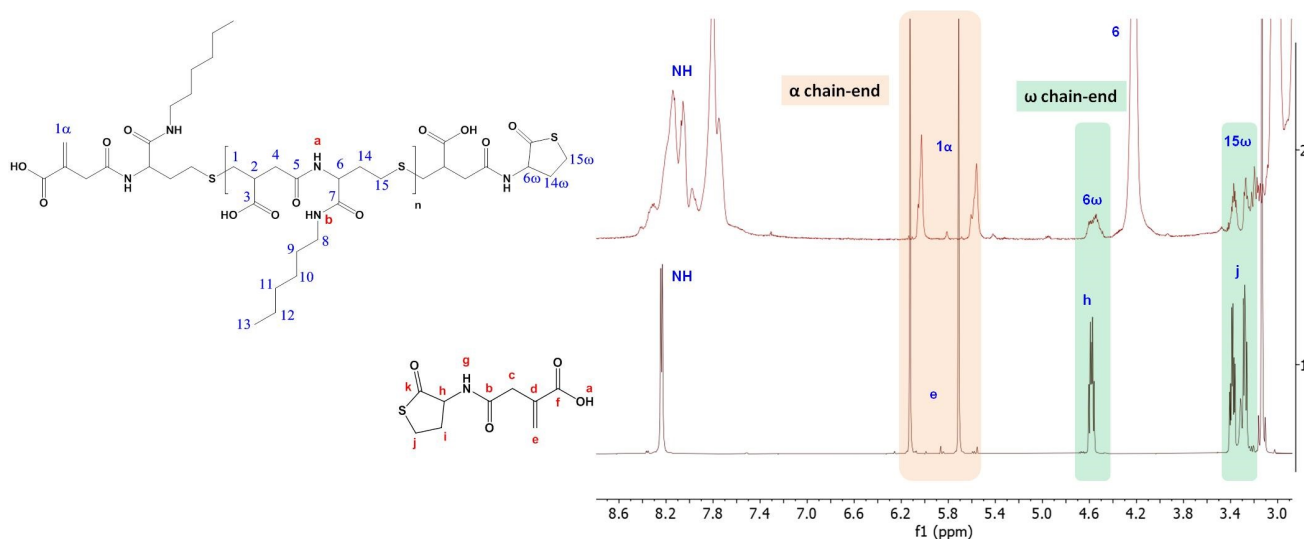

**Figure S17.**  $^1\text{H}$  NMR spectra in  $\text{DMSO-d}_6$  of M1 monomer and of a poly(amide-thioether) obtained in Table 1, run 1.

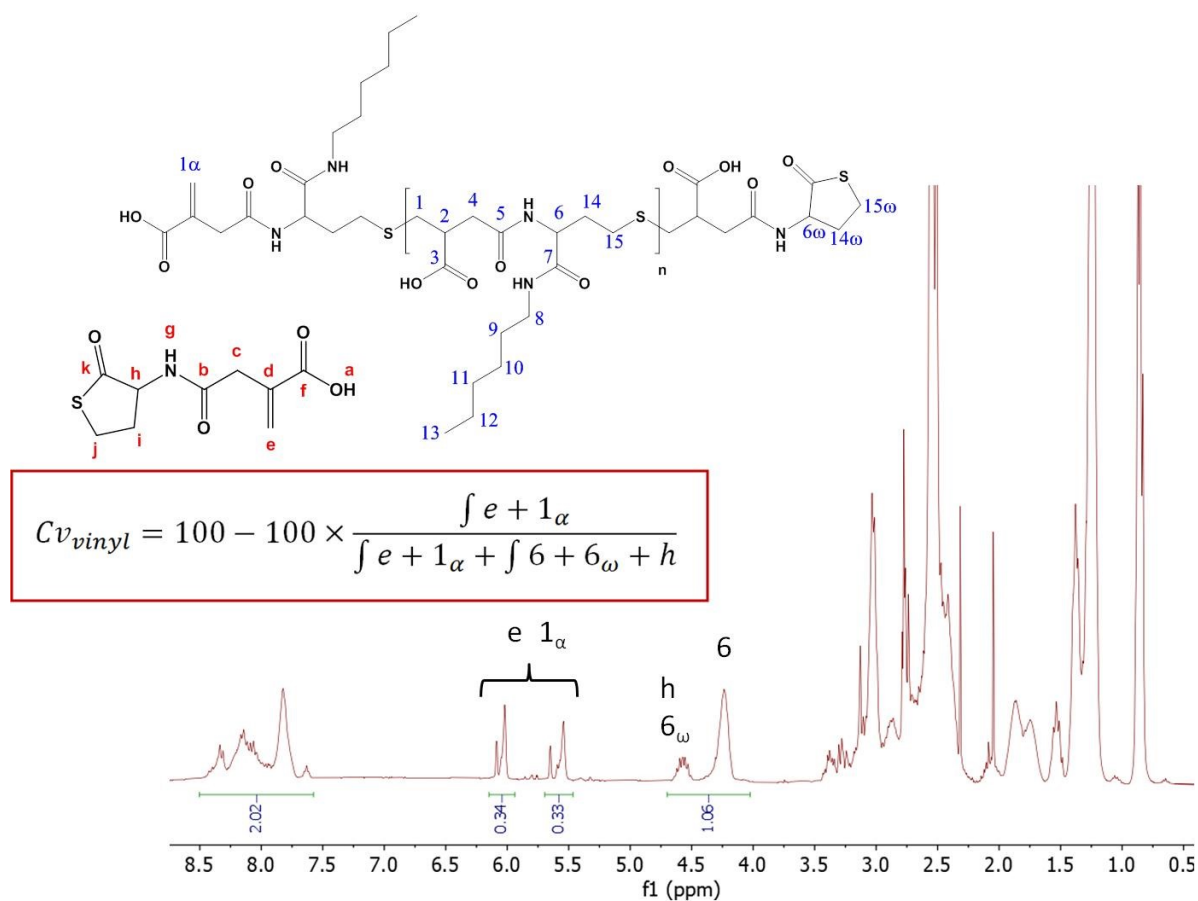

**Figure S18.**  $^1\text{H}$  NMR spectrum in  $\text{DMSO-d}_6$  at  $25^\circ\text{C}$  of the reaction mixture after 6 h of the synthesis of a poly(amide-thioether) by the reaction of M1 with *n*-hexylamine (Table 1, run1).

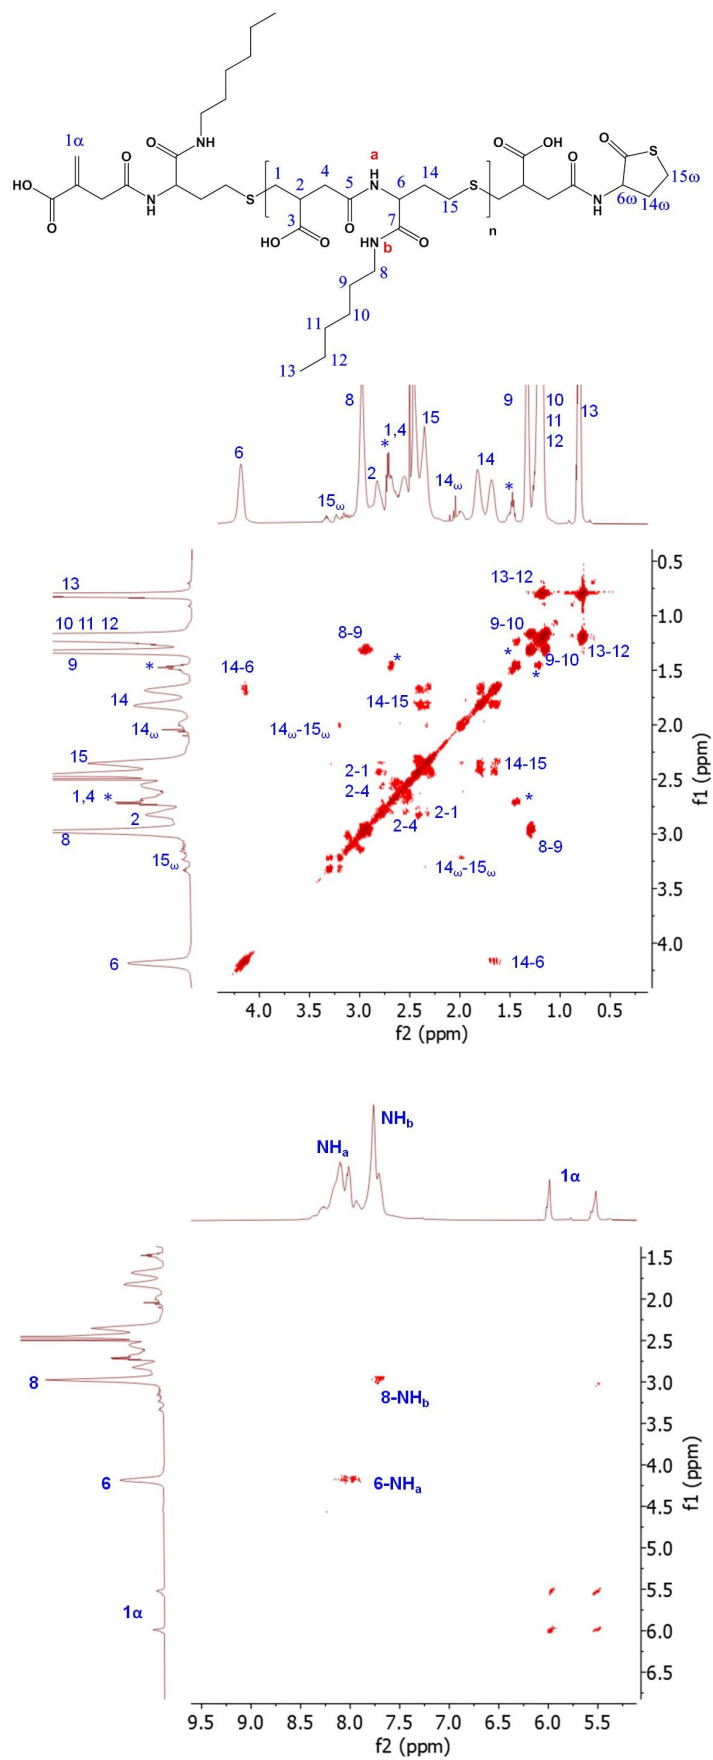

**Figure S19.**  $^1\text{H}$ - $^1\text{H}$  COSY NMR spectrum in  $\text{DMSO-d}_6$  at  $25^\circ\text{C}$  of a poly(amide-thioether) synthesized by the reaction of M1 with *n*-hexylamine (Table 1, run1).



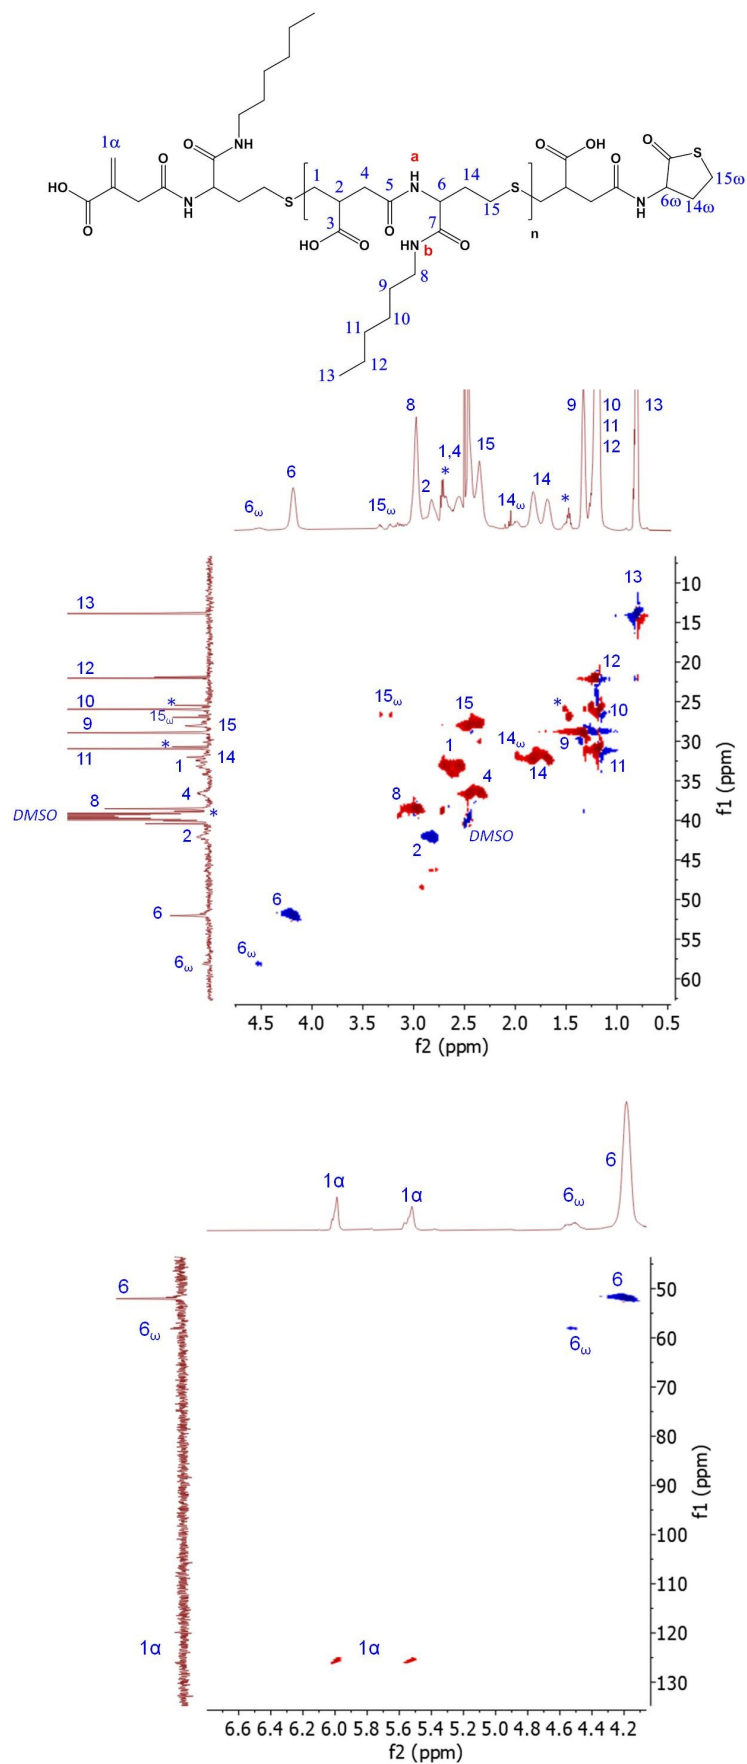

**Figure S20.**  $^1\text{H}$ - $^{13}\text{C}$  HSQC NMR spectrum in DMSO- $d_6$  at 25°C of a poly(amide-thioether) synthesized by the reaction of M1 with *n*-hexylamine (Table 1, run1).

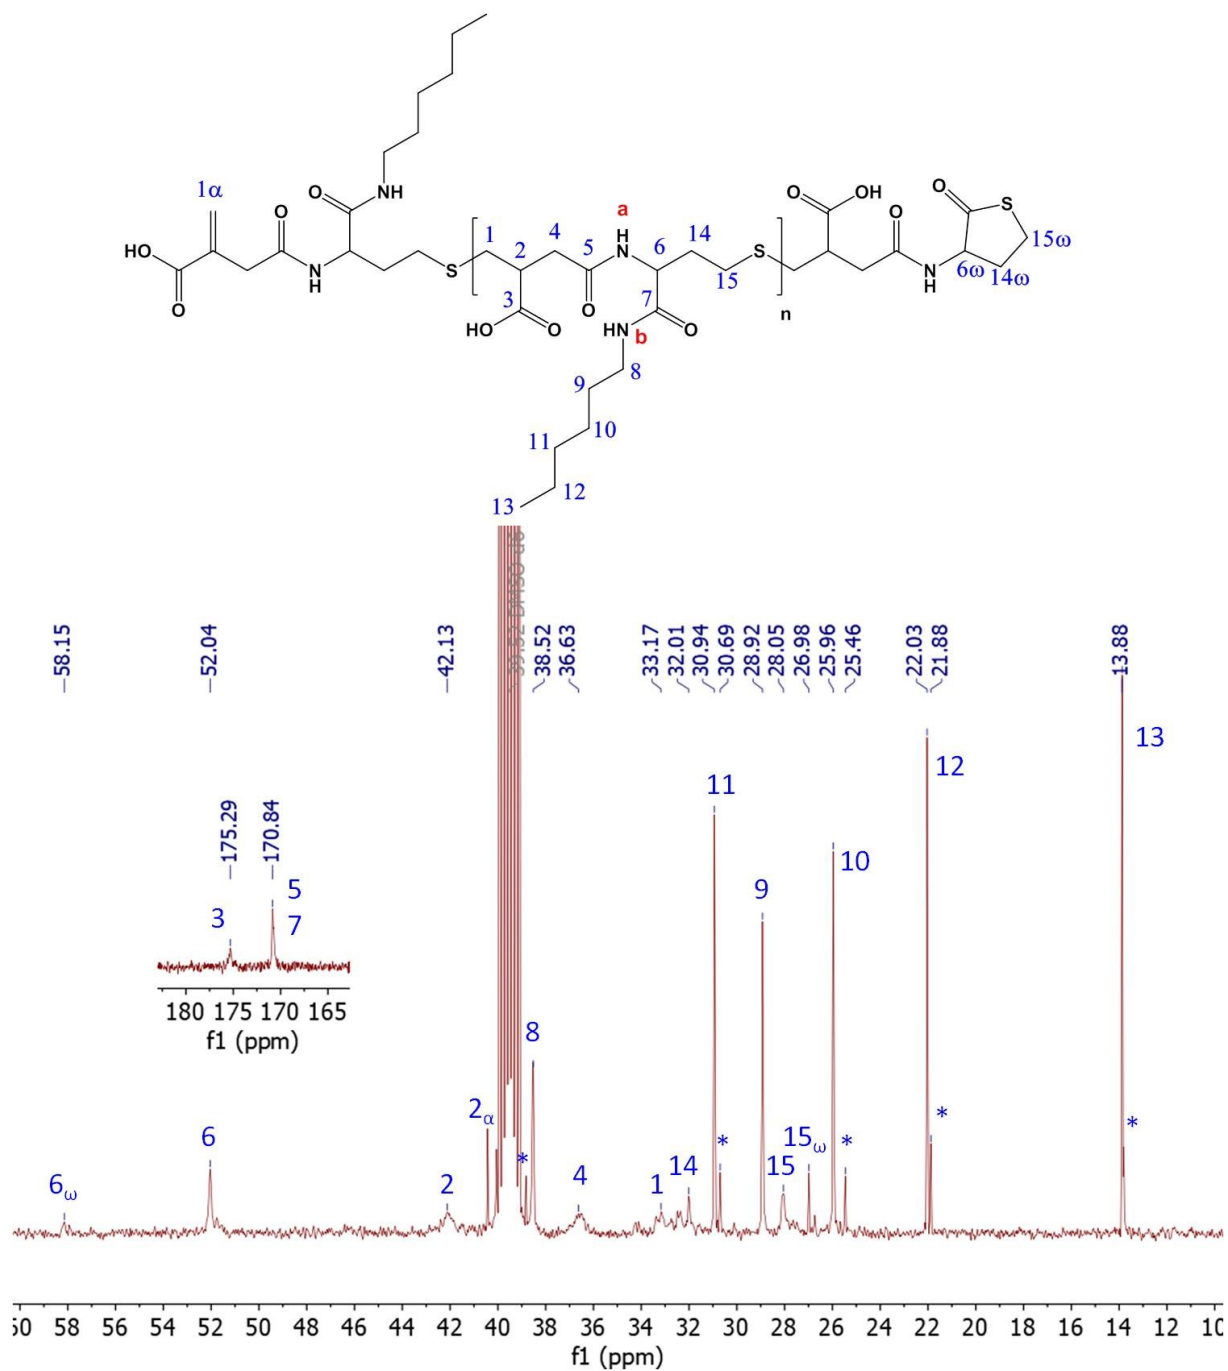

**Figure S21.** <sup>13</sup>C NMR spectrum in DMSO-d<sub>6</sub> at 25°C of a poly(amide-thioether) synthesized by the reaction of M1 with *n*-hexylamine (Table 1, run1).

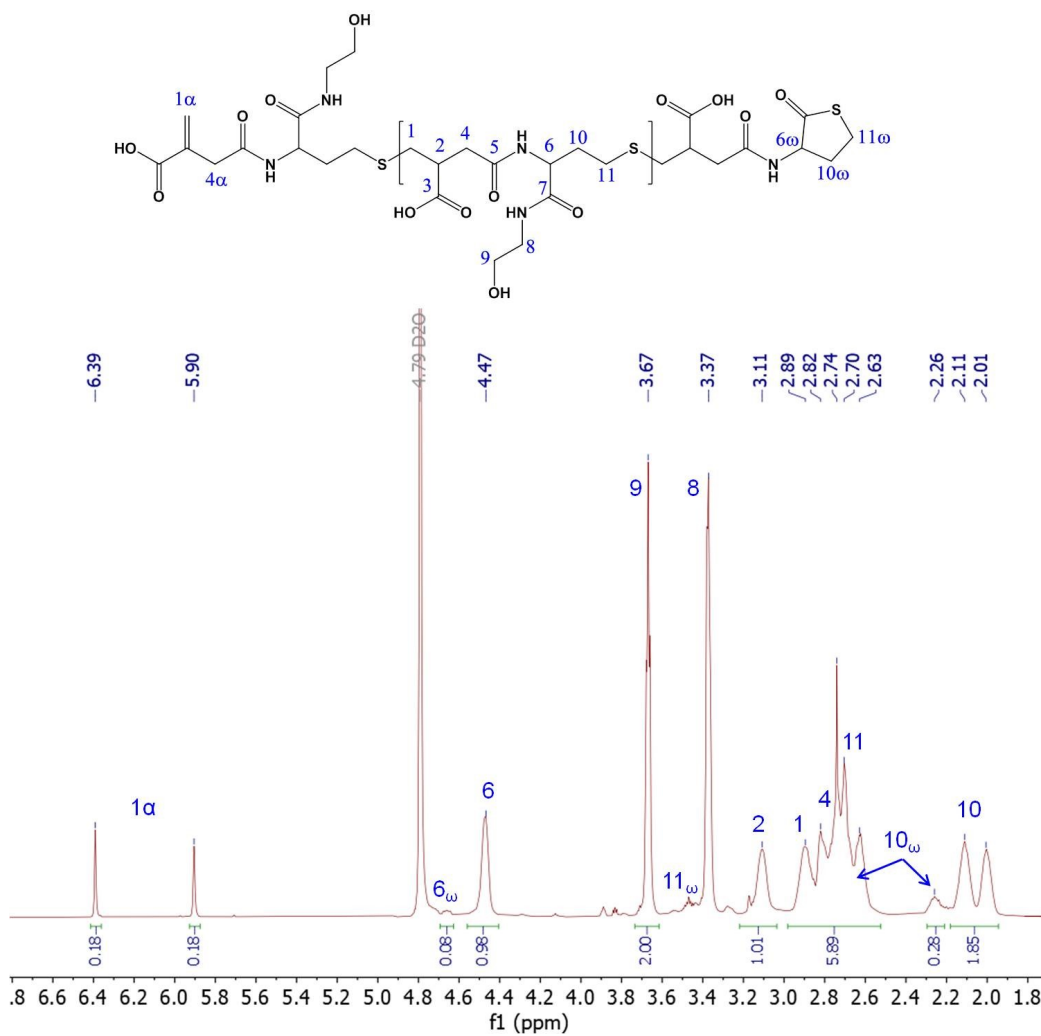

**Figure S22.** <sup>1</sup>H NMR spectrum in D<sub>2</sub>O at 25°C of a poly(amide-thioether) synthesized by the reaction of M1 with ethanolamine (Table 1, run 6).

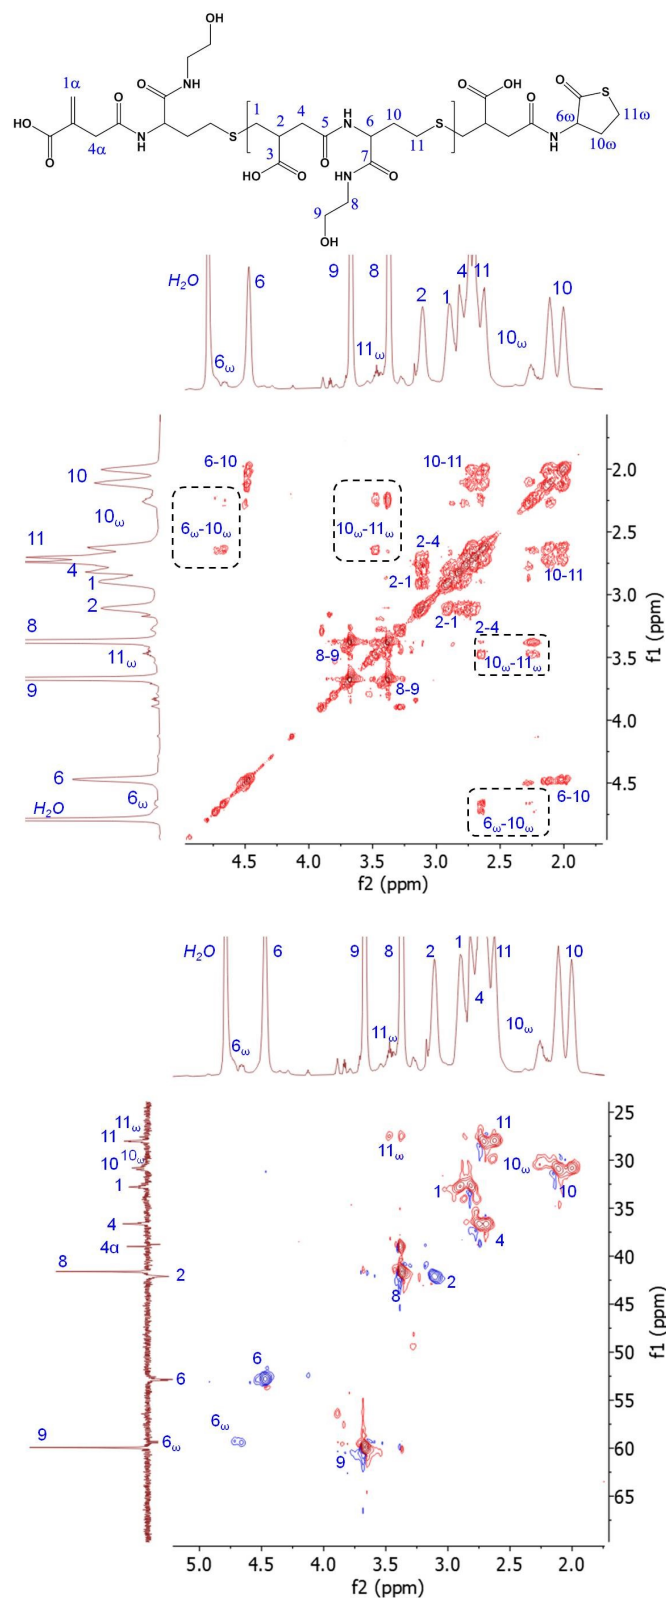

**Figure S23.**  $^1\text{H}$ - $^1\text{H}$  COSY NMR spectrum in  $\text{D}_2\text{O}$  at  $25^\circ\text{C}$  of a poly(amide-thioether) synthesized by the reaction of M1 with ethanolamine (Table 1, run 6).

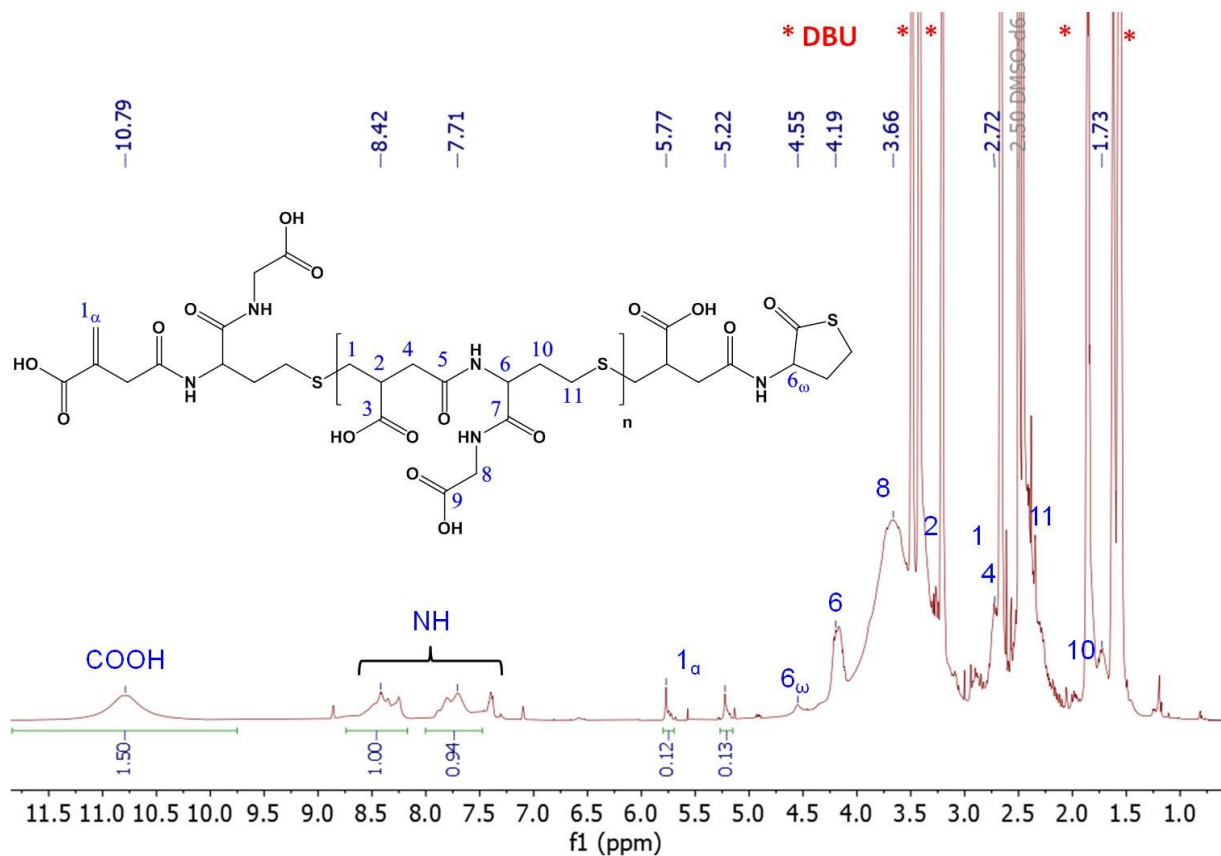

**Figure S24.** <sup>1</sup>H NMR spectrum in DMSO-d<sub>6</sub> at 25°C of a poly(amide-thioether) synthesized by the reaction of M1 with glycine (Table 1, run 8).

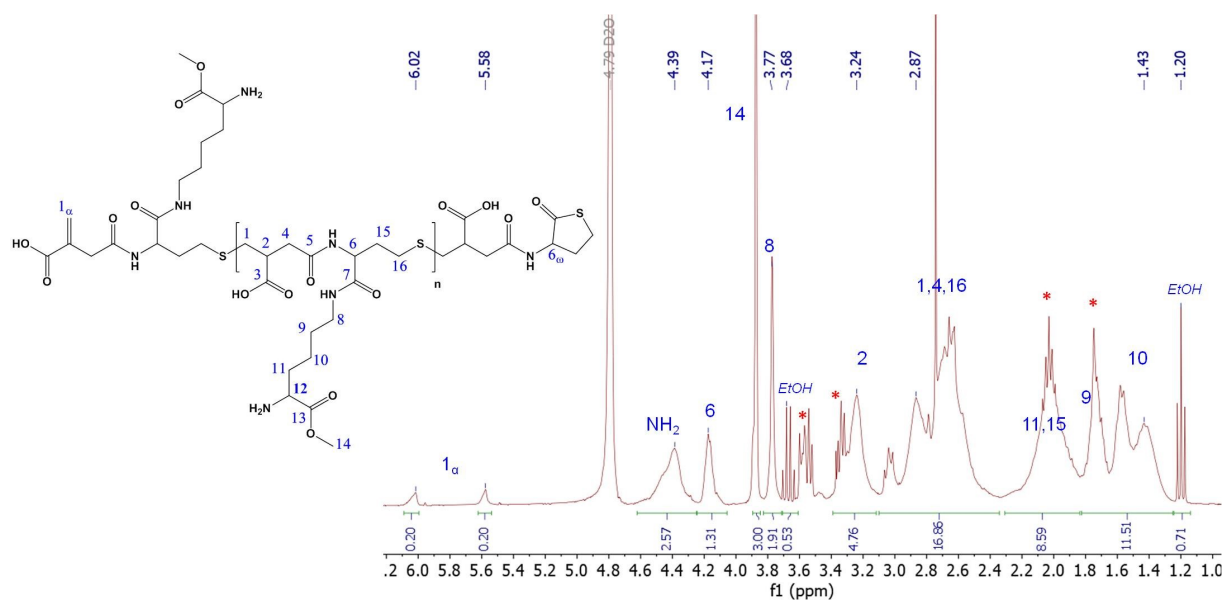

**Figure S25.** <sup>1</sup>H NMR spectrum in D<sub>2</sub>O at 25°C of a poly(amide-thioether) synthesized by the reaction of M1 with L-lysine methylester (Table 1, run 9).

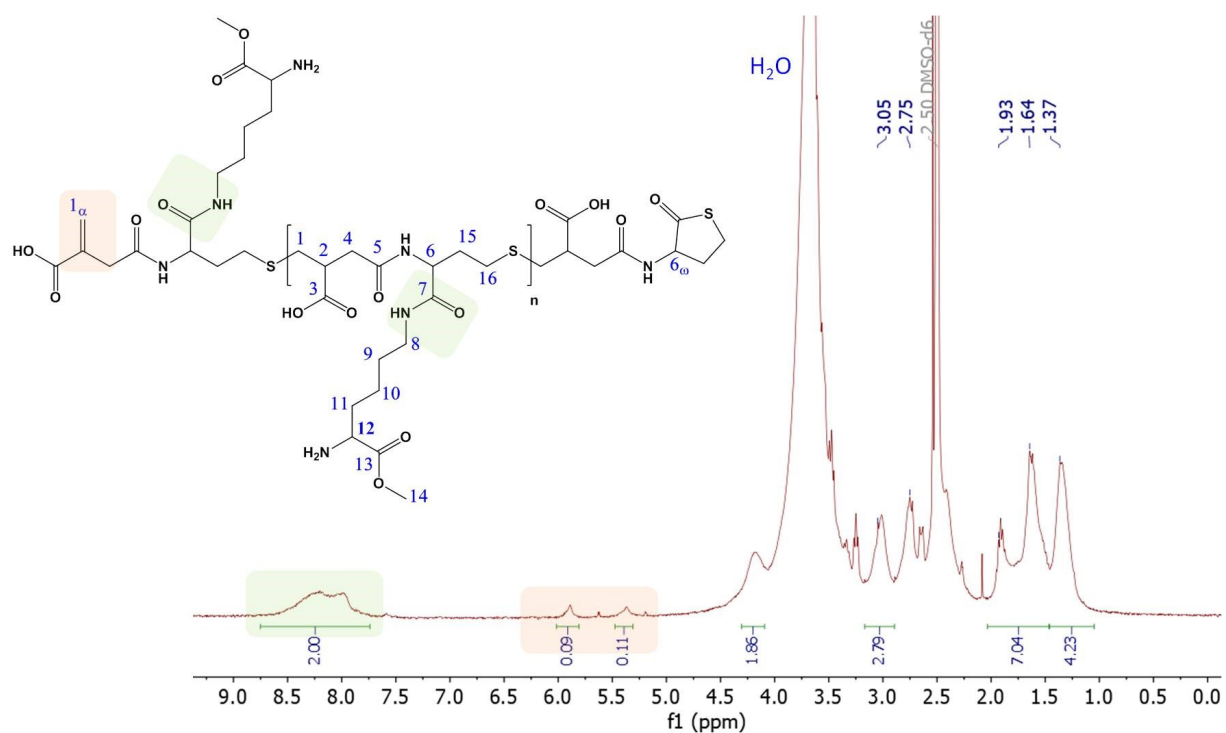

**Figure S26.**  $^1\text{H}$  NMR spectrum in DMSO- $d_6$  at 25°C of a poly(amide-thioether) synthesized by the reaction of M1 with L-lysine methylester (Table 1, run 9).

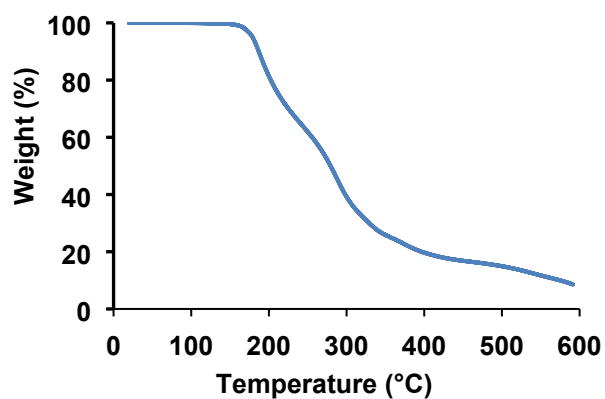

Figure S27. TGA profile for M1 monomer.

(A)

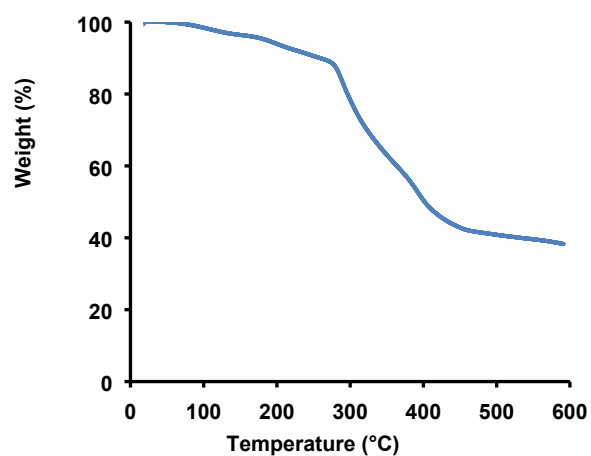

(B)

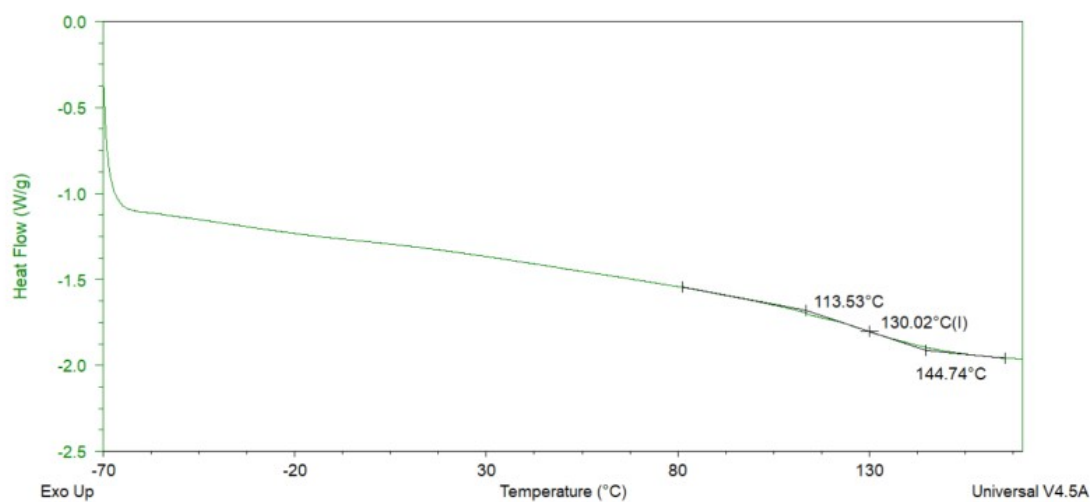

Figure S28. (A) TGA and (B) DSC thermograms for PR1, 2<sup>nd</sup> heating.

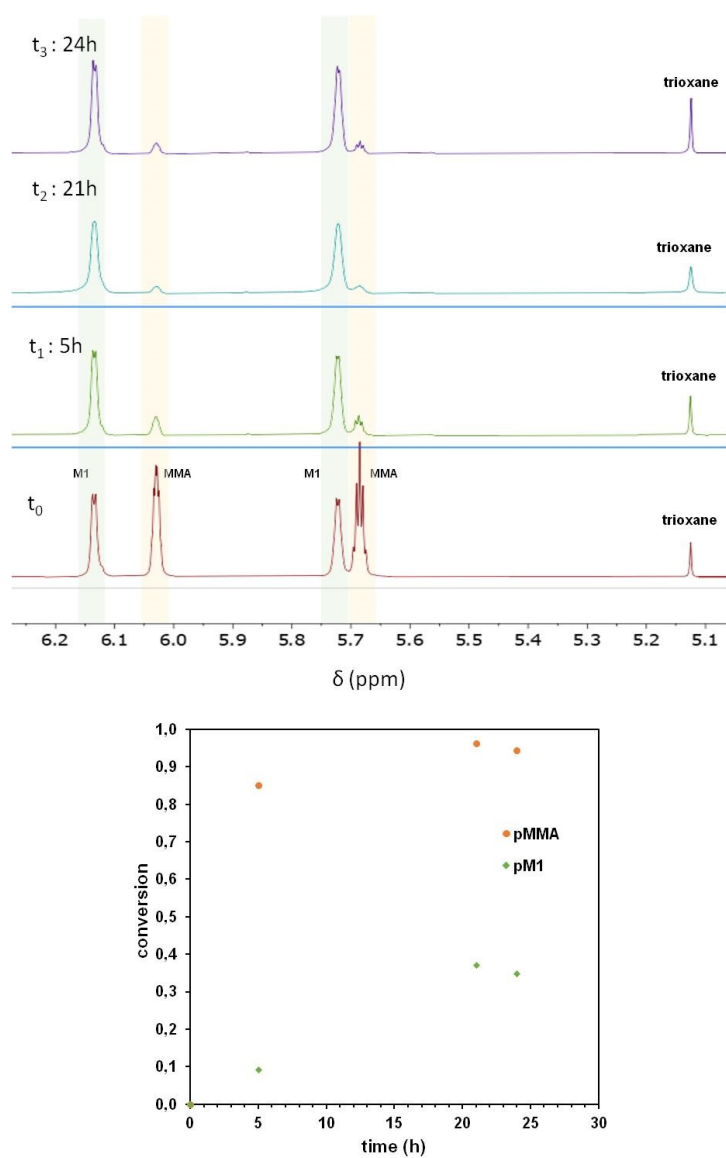

**Figure S29.** <sup>1</sup>H NMR overlay of aliquots from CPR1 reaction mixture (top) and individual plot of conversion over time (bottom).



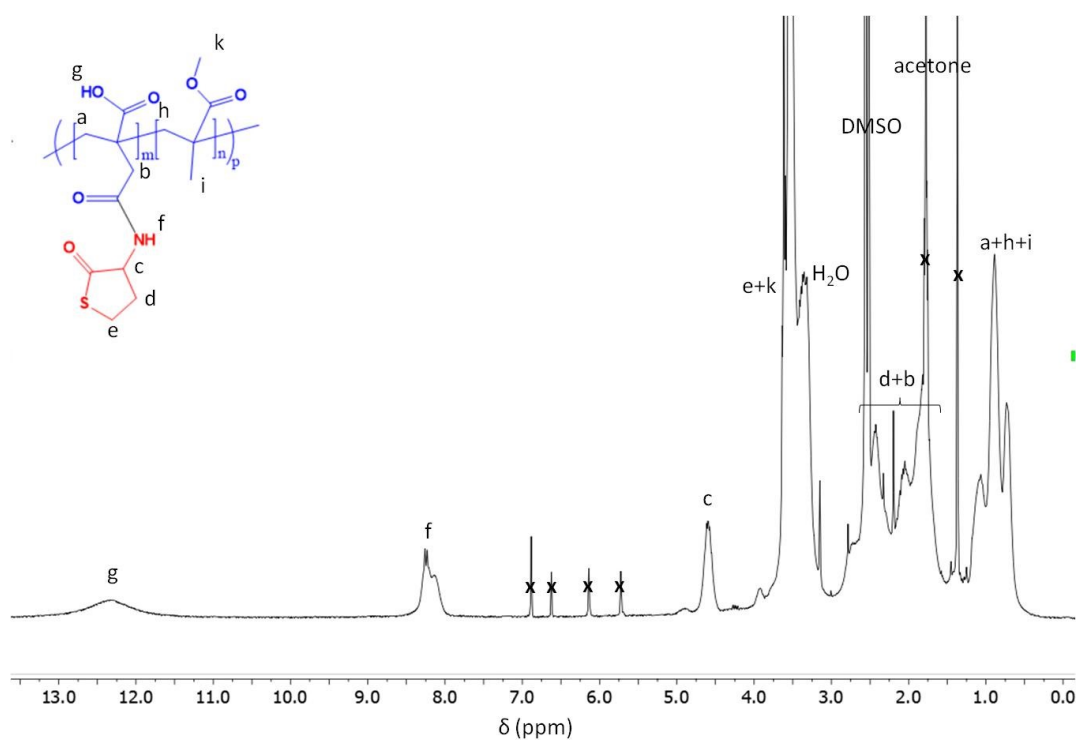

**Figure S30.**  $^1\text{H}$  NMR spectrum in  $\text{DMSO-d}_6$  at  $25^\circ\text{C}$  of the copolymer obtained by the copolymerization of M1 with MMA in Table 3, CPR1.

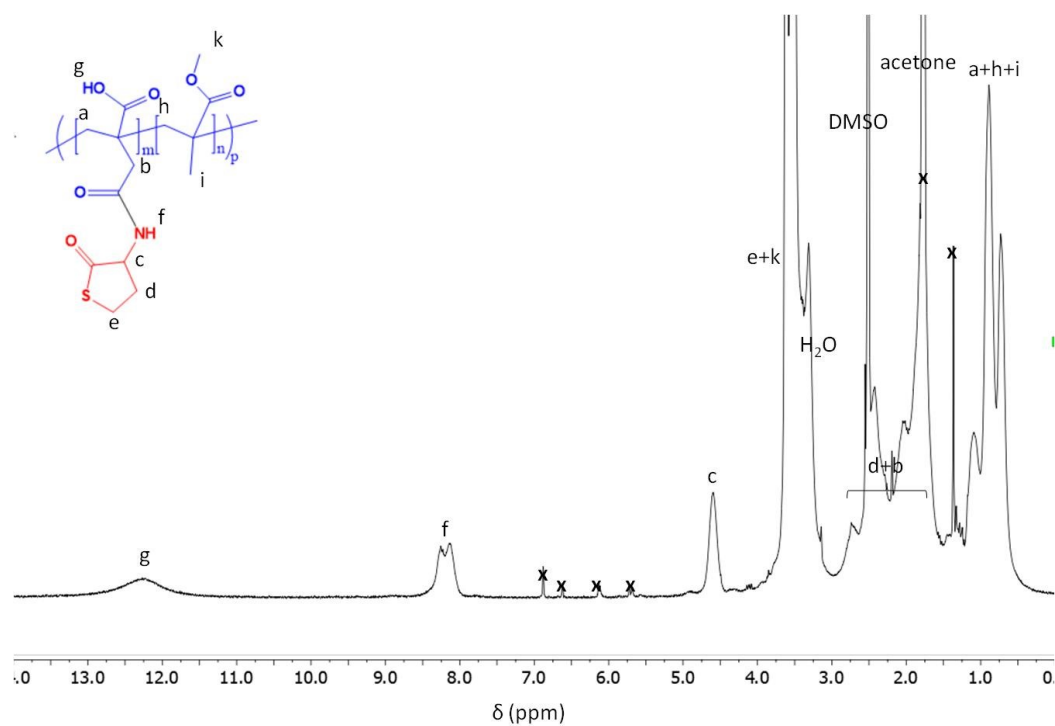

**Figure S31.**  $^1\text{H}$  NMR spectrum in  $\text{DMSO-d}_6$  at  $25^\circ\text{C}$  of the copolymer obtained by the copolymerization of M1 with MMA in Table 3, CPR2.

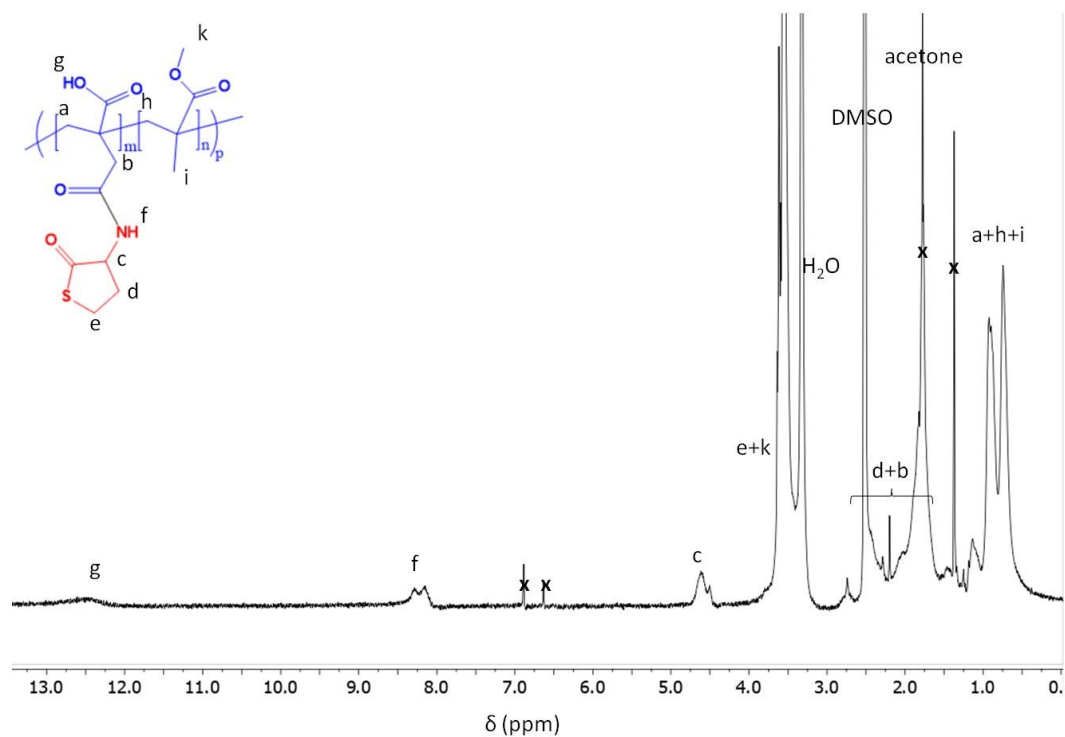

**Figure S32.**  $^1\text{H}$  NMR spectrum in  $\text{DMSO-d}_6$  of the copolymer obtained by the copolymerization of M1 with MMA in Table 3, CPR3.

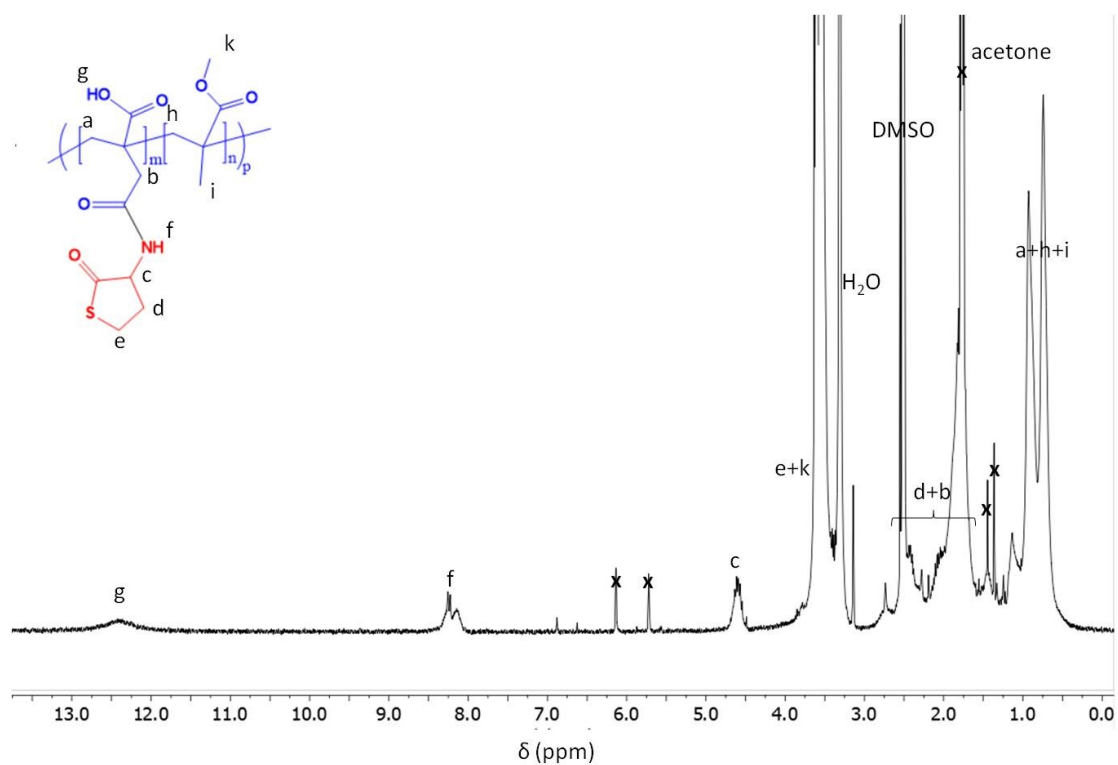

**Figure S33.**  $^1\text{H}$  NMR spectrum in  $\text{DMSO-d}_6$  of the copolymer obtained by the copolymerization of M1 with MMA in Table 3, CPR4.

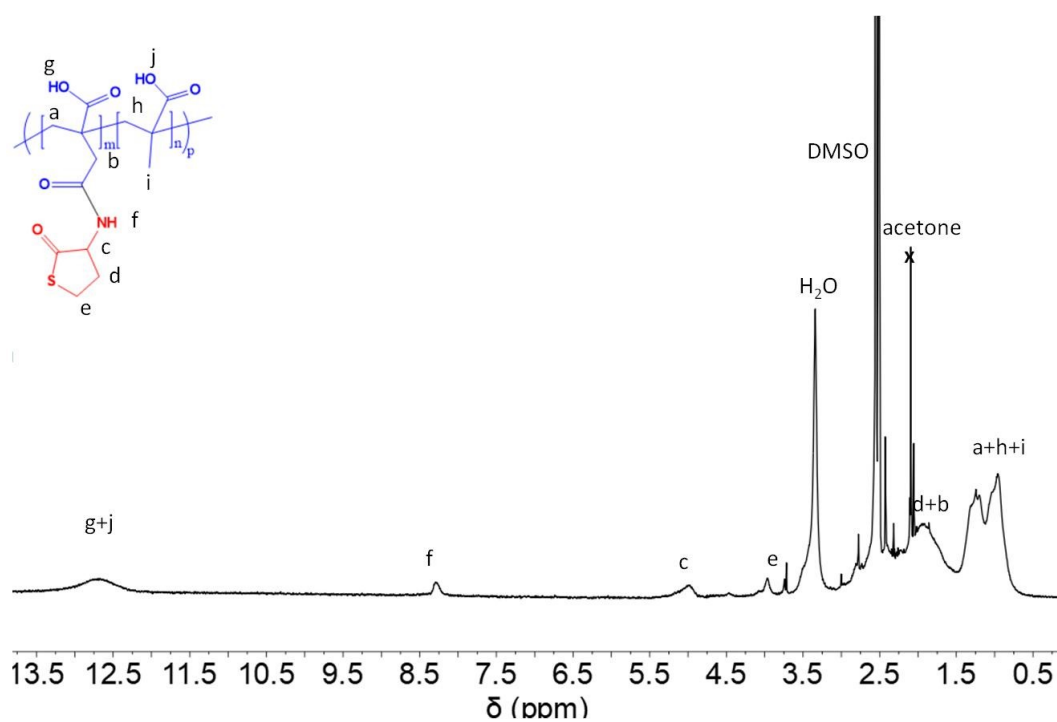

**Figure S34.**  $^1\text{H}$  NMR spectrum in  $\text{DMSO-d}_6$  of the copolymer obtained by the copolymerization of M1 with MMA in Table 3, CPR5.

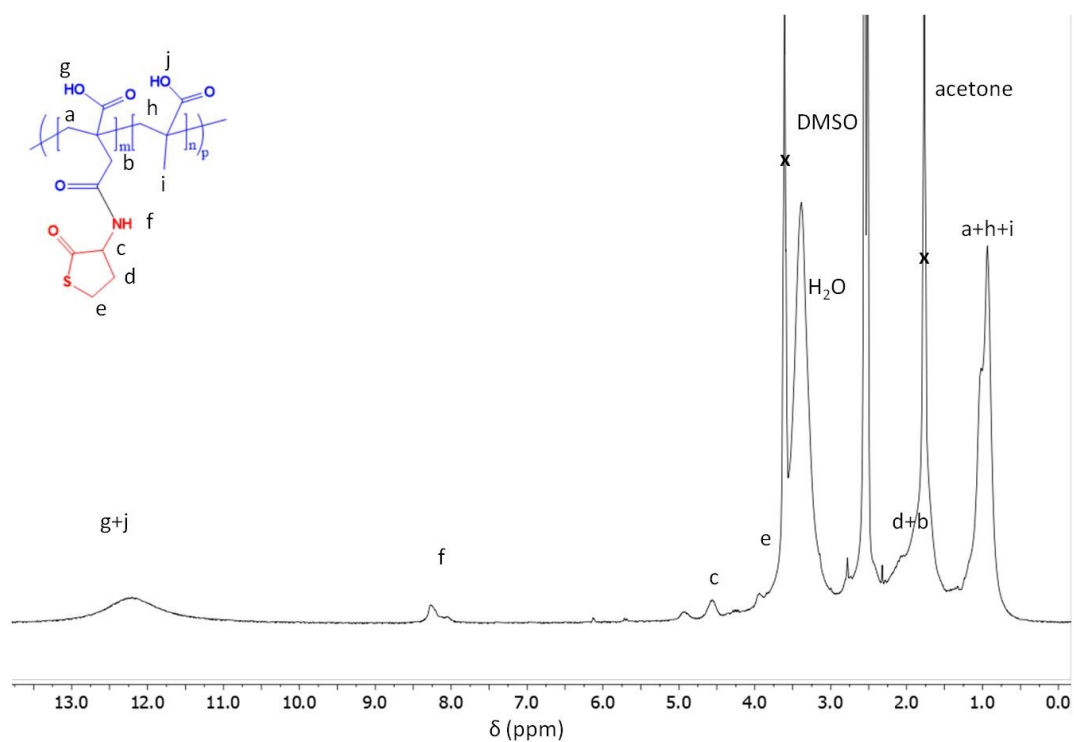

**Figure S35.**  $^1\text{H}$  NMR spectrum in  $\text{DMSO-d}_6$  of the copolymer obtained by the copolymerization of M1 with MAA in Table 3, CPR6.

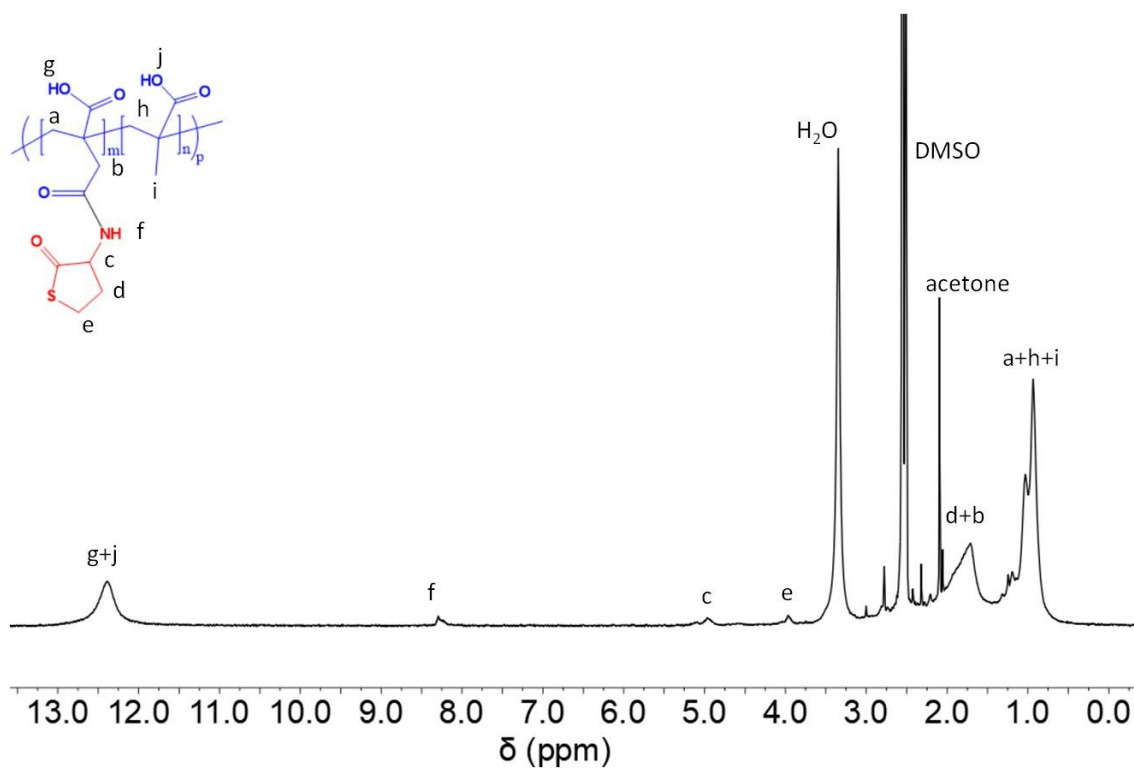

**Figure S36.**  $^1\text{H}$  NMR spectrum in  $\text{DMSO-d}_6$  of the copolymer obtained by the copolymerization of M1 with MAA in Table 3, CPR7.

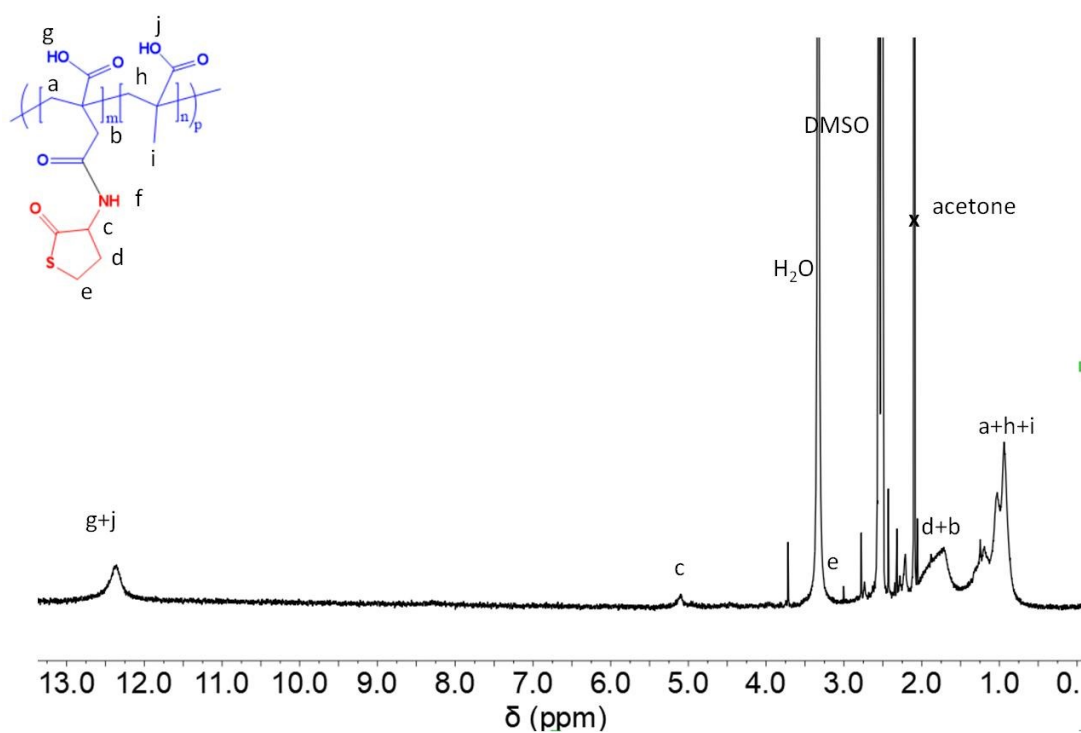

**Figure S37.**  $^1\text{H}$  NMR spectrum in  $\text{DMSO-d}_6$  of the copolymer obtained by the copolymerization of M1 with MAA in Table 3, CPR8.
